# Supplementary material
Source: PubMed Central journal article supplement (PMC2756547)
Supplement: mmc1.pdf [file mmc1.pdf]

**Supplemental Data**

***AJHG*, Volume 85**

**Integration of Genomic and Genetic Approaches**

**Implicates *IREB2* as a COPD Susceptibility Gene**

**Dawn L. DeMeo, Thomas Mariani, Soumyaroop Bhattacharya, Sorachai Srisuma, Christoph Lange, Augusto Litonjua, Raphael Bueno, Sreekumar G. Pillai, David A. Lomas, David Sparrow, Steven D. Shapiro, Gerard J. Criner, Hong P. Kim, Zhihua Chen, Augustine M. K. Choi, John Reilly, and Edwin K. Silverman**

**Table S1: Association Results for 71 Autosomal SNPs Tested in the NETT/NAS Cohort ( $p < 0.050$ )**

| <i>Chr.</i> | <i>HUGO Gene Name</i> | <i>SNP</i>  | <i>SNP Location</i> | <i>Probe ID from gene expression data set</i> | <i>P value</i>        |
|-------------|-----------------------|-------------|---------------------|-----------------------------------------------|-----------------------|
| 9           | <i>PTCH1</i>          | rs16909859  | 97244613            | 209815                                        | $3.40 \times 10^{-6}$ |
| 15          | <i>IREB2</i>          | rs2656069   | 76532762            | 225892                                        | $1.03 \times 10^{-5}$ |
| 15          | <i>IREB2</i>          | rs10851906  | 76561731            | 225892                                        | $2.46 \times 10^{-5}$ |
| 15          | <i>IREB2</i>          | rs2568494   | 76528019            | 225892                                        | $4.40 \times 10^{-5}$ |
| 15          | <i>SEMA6D</i>         | rs7167021   | 45833273            | 226492                                        | $1.92 \times 10^{-4}$ |
| 1           | <i>SYDE2</i>          | rs7511739   | 85395045            | 239847                                        | $3.15 \times 10^{-4}$ |
| 15          | <i>SEMA6D</i>         | rs17388803  | 45814496            | 226492                                        | $3.25 \times 10^{-4}$ |
| 15          | <i>SEMA6D</i>         | rs16960030  | 45838944            | 226492                                        | $4.58 \times 10^{-4}$ |
| 15          | <i>IREB2</i>          | rs1964678   | 76541055            | 225892                                        | $1.61 \times 10^{-3}$ |
| 15          | <i>IREB2</i>          | rs965604    | 76576278            | 225892                                        | $1.81 \times 10^{-3}$ |
| 15          | <i>IREB2</i>          | rs13180     | 76576543            | 225892                                        | $2.17 \times 10^{-3}$ |
| 15          | <i>SEMA6D</i>         | rs76739     | 45829438            | 226492                                        | $2.76 \times 10^{-3}$ |
| 15          | <i>IREB2</i>          | rs12593229  | 76552345            | 225892                                        | $2.95 \times 10^{-3}$ |
| 6           | <i>PHACTR2</i>        | rs9386042   | 144061147           | 227947                                        | $3.44 \times 10^{-3}$ |
| 3           | <i>TIGIT</i>          | rs4682534   | 115516788           | 213156                                        | $4.02 \times 10^{-3}$ |
| 1           | <i>ARHGAP29</i>       | rs3789689   | 94458173            | 1558280                                       | $4.05 \times 10^{-3}$ |
| 15          | <i>SEMA6D</i>         | rs765       | 45822977            | 226492                                        | $5.40 \times 10^{-3}$ |
| 14          | <i>DAAMI</i>          | rs17833769  | 58725214            | 226666                                        | $7.32 \times 10^{-3}$ |
| 15          | <i>SEMA6D</i>         | rs8025861   | 45836323            | 226492                                        | $7.42 \times 10^{-3}$ |
| 15          | <i>SEMA6D</i>         | rs11855291  | 45858167            | 226492                                        | $8.28 \times 10^{-3}$ |
| 21          | <i>CYYR1</i>          | rs17625613  | 26825130            | 228665                                        | $9.81 \times 10^{-3}$ |
| 12          | <i>AMIGO2</i>         | rs2898002   | 45762494            | 222108                                        | 0.01                  |
| 14          | <i>DAAMI</i>          | rs4898983   | 58828589            | 226666                                        | 0.01                  |
| 6           | <i>PHACTR2</i>        | rs9321939   | 144096465           | 227947                                        | 0.01                  |
| 15          | <i>SEMA6D</i>         | rs568215    | 45850368            | 226492                                        | 0.01                  |
| 14          | <i>DAAMI</i>          | rs7150479   | 58795887            | 226666                                        | 0.01                  |
| 15          | <i>SEMA6D</i>         | rs532598    | 45845363            | 226492                                        | 0.01                  |
| 15          | <i>SEMA6D</i>         | rs634939    | 45858069            | 226492                                        | 0.01                  |
| 12          | <i>ZNF84</i>          | rs7958575   | 132146663           | 228630                                        | 0.01                  |
| 1           | <i>EFCAB7</i>         | rs217448    | 63782062            | 226800                                        | 0.01                  |
| 12          | <i>KITLG</i>          | rs11610915* | 87426172            | 226534                                        | 0.01                  |
| 3           | <i>TIGIT</i>          | rs9825470   | 115511323           | 213156                                        | 0.01                  |
| 15          | <i>SEMA6D</i>         | rs12898855  | 45801857            | 226492                                        | 0.01                  |
| 14          | <i>DAAMI</i>          | rs965590    | 58818577            | 226666                                        | 0.01                  |
| 2           | <i>DYNC2L1I</i>       | rs10205936  | 43844814            | 227148                                        | 0.02                  |
| 1           | <i>ARHGAP29</i>       | rs12077584  | 94443982            | 1558280                                       | 0.02                  |
| 6           | <i>PHACTR2</i>        | rs761627    | 144078630           | 227947                                        | 0.02                  |
| 15          | <i>SEMA6D</i>         | rs586799    | 45812214            | 226492                                        | 0.02                  |
| 21          | <i>CYYR1</i>          | rs222973    | 26800940            | 228665                                        | 0.02                  |
| 12          | <i>AMIGO2</i>         | rs2269828   | 45757706            | 222108                                        | 0.02                  |
| 14          | <i>DAAMI</i>          | rs927964    | 58873466            | 226666                                        | 0.03                  |
| 1           | <i>ARHGAP29</i>       | rs6673184*  | 94441895            | 1558280                                       | 0.03                  |
| 6           | <i>PHACTR2</i>        | rs3811095   | 143970633           | 227947                                        | 0.03                  |
| 6           | <i>CCDC90A</i>        | rs3757251*  | 13899115            | 220094                                        | 0.03                  |
| 21          | <i>CYYR1</i>          | rs2830273   | 26831258            | 228665                                        | 0.03                  |
| 12          | <i>AMIGO2</i>         | rs7979883*  | 45753285            | 222108                                        | 0.03                  |

| <i>Chr.</i> | <i>HUGO Gene Name</i> | <i>SNP</i> | <i>SNP Location</i> | <i>Probe ID from gene expression data set</i> | <i>P value</i> |
|-------------|-----------------------|------------|---------------------|-----------------------------------------------|----------------|
| 21          | <i>CYYR1</i>          | rs2830271  | 26828867            | 228665                                        | 0.03           |
| 21          | <i>CYYR1</i>          | rs17619458 | 26803092            | 228665                                        | 0.04           |
| 8           | <i>WHSCIL1</i>        | rs2932005  | 38351031            | 225318                                        | 0.04           |
| 14          | <i>DAAMI</i>          | rs12888995 | 58796019            | 226666                                        | 0.04           |
| 6           | <i>PHACTR2</i>        | rs17072830 | 143982460           | 227947                                        | 0.04           |
| 19          | <i>HIF3A</i>          | rs10414875 | 51514136            | 1555318                                       | 0.04           |
| 21          | <i>CYYR1</i>          | rs222954   | 26839258            | 228665                                        | 0.04           |
| 19          | <i>HIF3A</i>          | rs887946   | 51508628            | 1555318                                       | 0.04           |
| 6           | <i>PHACTR2</i>        | rs2073214  | 144123302           | 227947                                        | 0.04           |
| 21          | <i>CYYR1</i>          | rs222921   | 26806368            | 228665                                        | 0.04           |
| 12          | <i>ZNF84</i>          | rs7133210  | 132129156           | 228630                                        | 0.04           |
| 9           | <i>PTCH1</i>          | rs2236405  | 97251393            | 209815                                        | 0.04           |
| 1           | <i>EIF2C4</i>         | rs727005   | 36053923            | 227930                                        | 0.04           |
| 14          | <i>DAAMI</i>          | rs2099636  | 58838891            | 226666                                        | 0.04           |
| 10          | <i>ZNF248</i>         | rs200932*  | 38168774            | 213269                                        | 0.04           |
| 8           | <i>CSPP1</i>          | rs16933170 | 68192032            | 227105                                        | 0.04           |
| 8           | <i>CSPP1</i>          | rs16933182 | 68236691            | 227105                                        | 0.04           |
| 6           | <i>KIAA0240</i>       | rs9471915  | 42862590            | 1559964                                       | 0.05           |
| 21          | <i>CYYR1</i>          | rs17536311 | 26818798            | 228665                                        | 0.05           |
| 1           | <i>ARHGAP29</i>       | rs6682149  | 94448856            | 1558280                                       | 0.05           |
| 19          | <i>HIF3A</i>          | rs3752207* | 51507545            | 1555318                                       | 0.05           |
| 1           | <i>ITGB3BP</i>        | rs17391823 | 63759453            | 226800                                        | 0.05           |
| 8           | <i>LETM2</i>          | rs12678205 | 38359165            | 225318                                        | 0.05           |
| 19          | <i>HIF3A</i>          | rs17173172 | 51507137            | 1555318                                       | 0.05           |
| 6           | <i>PHACTR2</i>        | rs722755   | 144125078           | 227947                                        | 0.05           |

**\*Out of HWE:**

rs6673184 p=0.03  
rs3757251 p=0.01  
rs200932 p=3x10<sup>-3</sup>  
rs7979883 p=1.24x10<sup>-17</sup>  
rs11610915 p=0.02  
rs3752207 p=2.28x10<sup>-11</sup>

**Table S2: Pedigree-Based Association Test for BEOCPD Families for Post-Bronchodilator FEV<sub>1</sub>**

| <i>Chr.</i> | <i>Gene</i>     | <i>SNP rs number</i> | <i>Location</i> | <i>Minor allele</i> | <i>MAF</i>  | <i>Informative families for PBAT analysis</i> | <i>NETT/NAS p-value</i>     | <i>EOCOPD p-value for post-bronchodilator FEV<sub>1</sub></i> | <i>Combined p-value-Fisher method</i> |
|-------------|-----------------|----------------------|-----------------|---------------------|-------------|-----------------------------------------------|-----------------------------|---------------------------------------------------------------|---------------------------------------|
| 15          | <b>IREB2</b>    | <b>rs2568494*</b>    | <b>76528019</b> | <b>A</b>            | <b>0.38</b> | <b>23</b>                                     | <b>4.40x10<sup>-5</sup></b> | <b>9.25x10<sup>-3</sup></b>                                   | <b>6.39 x10<sup>-6</sup></b>          |
| 15          | <b>IREB2</b>    | <b>rs2656069 *</b>   | <b>76532762</b> | <b>C</b>            | <b>0.19</b> | <b>10</b>                                     | <b>1.03x10<sup>-5</sup></b> | <b>0.35</b>                                                   | <b>4.93x10<sup>-5</sup></b>           |
| 15          | <b>IREB2</b>    | <b>rs10851906</b>    | <b>76561731</b> | <b>G</b>            | <b>0.18</b> | <b>11</b>                                     | <b>2.46x10<sup>-5</sup></b> | <b>0.21</b>                                                   | <b>6.68x10<sup>-5</sup></b>           |
| 6           | <i>PHACTR2</i>  | rs9386042            | 144061147       | C                   | 0.25        | 10                                            | 3.44x10 <sup>-3</sup>       | 0.07                                                          | 2.37x10 <sup>-3</sup>                 |
| 21          | <i>CYYR1</i>    | rs222973             | 26800940        | T                   | 0.33        | 15                                            | 0.02                        | 0.01                                                          | 2.44 x10 <sup>-3</sup>                |
| 14          | <i>DAAM1</i>    | rs17833769           | 58725214        | A                   | 0.23        | 10                                            | 7.32 x10 <sup>-3</sup>      | 0.08                                                          | 4.97x10 <sup>-3</sup>                 |
| 15          | <i>SEMA6D</i>   | rs76739              | 45829438        | G                   | 0.41        | 22                                            | 2.76x10 <sup>-3</sup>       | 0.27                                                          | 6.24x10 <sup>-3</sup>                 |
| 15          | <b>IREB2</b>    | <b>rs1964678</b>     | <b>76541055</b> | <b>A</b>            | <b>0.35</b> | <b>20</b>                                     | <b>1.61x10<sup>-3</sup></b> | <b>0.76</b>                                                   | <b>9.44x10<sup>-3</sup></b>           |
| 15          | <b>IREB2</b>    | <b>rs965604</b>      | <b>76576278</b> | <b>G</b>            | <b>0.35</b> | <b>22</b>                                     | <b>1.81x10<sup>-3</sup></b> | <b>0.75</b>                                                   | <b>0.01</b>                           |
| 15          | <b>IREB2**</b>  | <b>rs13180</b>       | <b>76576543</b> | <b>C</b>            | <b>0.36</b> | <b>20</b>                                     | <b>2.17x10<sup>-3</sup></b> | <b>0.71</b>                                                   | <b>0.01</b>                           |
| 15          | <i>SEMA6D</i>   | rs634939             | 45858069        | C                   | 0.41        | 16                                            | 0.01                        | 0.18                                                          | 0.01                                  |
| 6           | <i>PHACTR2</i>  | rs9321939            | 144096465       | C                   | 0.20        | 14                                            | 0.01                        | 0.20                                                          | 0.01                                  |
| 12          | <i>AMIGO2</i>   | rs2898002            | 45762494        | G                   | 0.29        | 22                                            | 0.01                        | 0.24                                                          | 0.02                                  |
| 15          | <b>IREB2</b>    | <b>rs12593229</b>    | <b>76552345</b> | <b>T</b>            | <b>0.35</b> | <b>21</b>                                     | <b>2.95x10<sup>-3</sup></b> | <b>0.87</b>                                                   | <b>0.02</b>                           |
| 15          | <i>SEMA6D</i>   | rs8025861            | 45836323        | T                   | 0.41        | 19                                            | 7.42x10 <sup>-3</sup>       | 0.35                                                          | 0.02                                  |
| 15          | <i>SEMA6D</i>   | rs11855291           | 45858167        | A                   | 0.23        | 13                                            | 8.28x10 <sup>-3</sup>       | 0.33                                                          | 0.02                                  |
| 2           | <i>DYNC2L1I</i> | rs10205936           | 43844814        | T                   | 0.30        | 12                                            | 0.02                        | 0.19                                                          | 0.02                                  |
| 15          | <i>SEMA6D</i>   | rs568215             | 45850368        | T                   | 0.40        | 20                                            | 0.01                        | 0.30                                                          | 0.02                                  |
| 14          | <i>DAAM1</i>    | rs965590             | 58818577        | C                   | 0.19        | 14                                            | 0.01                        | 0.23                                                          | 0.02                                  |
| 14          | <i>DAAM1</i>    | rs12888995           | 58796019        | A                   | 0.24        | 14                                            | 0.04                        | 0.10                                                          | 0.02                                  |
| 21          | <i>CYYR1</i>    | rs222921             | 26806368        | G                   | 0.43        | 20                                            | 0.04                        | 0.10                                                          | 0.03                                  |
| 15          | <i>SEMA6D</i>   | rs12898855           | 45801857        | C                   | 0.40        | 16                                            | 0.01                        | 0.35                                                          | 0.03                                  |
| 1           | <i>EIF2C4</i>   | rs727005             | 36053923        | G                   | 0.09        | 10                                            | 0.04                        | 0.11                                                          | 0.03                                  |
| 15          | <i>SEMA6D</i>   | rs765                | 45822977        | G                   | 0.47        | 23                                            | 5.40x10 <sup>-3</sup>       | 0.90                                                          | 0.03                                  |
| 15          | <i>SEMA6D</i>   | rs586799             | 45812214        | G                   | 0.39        | 21                                            | 0.02                        | 0.24                                                          | 0.03                                  |
| 12          | <i>ZNF84</i>    | rs7958575            | 132146663       | C                   | 0.27        | 14                                            | 0.01                        | 0.46                                                          | 0.03                                  |
| 1           | <i>EFCAB7</i>   | rs217448             | 63782062        | G                   | 0.33        | 21                                            | 0.01                        | 0.61                                                          | 0.04                                  |
| 14          | <i>DAAM1</i>    | rs4898983            | 58828589        | C                   | 0.32        | 17                                            | 0.01                        | 0.71                                                          | 0.04                                  |
| 15          | <i>SEMA6D</i>   | rs532598             | 45845363        | A                   | 0.30        | 14                                            | 0.01                        | 0.76                                                          | 0.05                                  |
| 12          | <i>AMIGO2</i>   | rs7979883            | 45753285        | T                   | 0.30        | 19                                            | 0.03                        | 0.24                                                          | 0.05                                  |
| 14          | <i>DAAM1</i>    | rs7150479            | 58795887        | G                   | 0.47        | 17                                            | 0.01                        | 0.80                                                          | 0.05                                  |
| 12          | <i>AMIGO2</i>   | rs2269828            | 45757706        | A                   | 0.30        | 20                                            | 0.02                        | 0.41                                                          | 0.06                                  |
| 3           | <i>TIGIT</i>    | rs9825470            | 115511323       | G                   | 0.42        | 22                                            | 0.01                        | 0.97                                                          | 0.07                                  |
| 6           | <i>PHACTR2</i>  | rs761627             | 144078630       | A                   | 0.49        | 25                                            | 0.02                        | 0.69                                                          | 0.07                                  |
| 6           | <i>PHACTR2</i>  | rs2073214            | 144123302       | T                   | 0.15        | 12                                            | 0.04                        | 0.40                                                          | 0.08                                  |
| 14          | <i>DAAM1</i>    | rs927964             | 58873466        | A                   | 0.32        | 17                                            | 0.03                        | 0.63                                                          | 0.08                                  |
| 21          | <i>CYYR1</i>    | rs2830271            | 26828867        | G                   | 0.25        | 10                                            | 0.03                        | 0.53                                                          | 0.09                                  |
| 19          | <i>HIF3A</i>    | rs887946             | 51508628        | G                   | 0.33        | 17                                            | 0.04                        | 0.50                                                          | 0.10                                  |
| 12          | <i>ZNF84</i>    | rs7133210            | 132129156       | T                   | 0.18        | 12                                            | 0.04                        | 0.48                                                          | 0.10                                  |
| 8           | <i>LETM2</i>    | rs12678205           | 38359165        | G                   | 0.21        | 14                                            | 0.05                        | 0.59                                                          | 0.13                                  |
| 6           | <i>PHACTR2</i>  | rs722755             | 144125078       | A                   | 0.07        | 10                                            | 0.05                        | 0.65                                                          | 0.14                                  |
| 1           | <i>EFCAB7</i>   | rs17391823           | 63759453        | C                   | 0.33        | 23                                            | 0.05                        | 0.80                                                          | 0.16                                  |
| 14          | <i>DAAM1</i>    | rs2099636            | 58838891        | A                   | 0.33        | 17                                            | 0.04                        | 0.96                                                          | 0.17                                  |

\*Met Fisher combined P value threshold of <5.6x10<sup>-5</sup>\*\*GWAS data from British 1958 Birth Cohort Study for FEV<sub>1</sub> p=3x10<sup>-2</sup>

**Table S3: Pedigree-Based Association Test for BEOCPD Families for Pre-Bronchodilator FEV<sub>1</sub>**

| <i>Chr.</i> | <i>Gene</i>     | <i>SNP rs number</i> | <i>Location</i> | <i>Minor allele</i> | <i>Minor allele frequency EOCOPD</i> | <i>Informative families for PBAT analysis</i> | <i>NETT/NAS p-value</i> | <i>EOCOPD p-value for pre-bronchodilator FEV<sub>1</sub></i> | <i>Combined p-value-Fisher method</i> |
|-------------|-----------------|----------------------|-----------------|---------------------|--------------------------------------|-----------------------------------------------|-------------------------|--------------------------------------------------------------|---------------------------------------|
| 15          | <i>IREB2</i>    | rs2568494*           | 76528019        | A                   | 0.38                                 | 23                                            | 4.40x10 <sup>-5</sup>   | 7.90x10 <sup>-3</sup>                                        | 5.52x10 <sup>-6</sup>                 |
| 15          | <i>IREB2</i>    | rs2656069*           | 76532762        | C                   | 0.19                                 | 10                                            | 1.03x10 <sup>-5</sup>   | 0.20                                                         | 2.88x10 <sup>-5</sup>                 |
| 15          | <i>IREB2</i>    | rs10851906*          | 76561731        | G                   | 0.18                                 | 11                                            | 2.46x10 <sup>-5</sup>   | 0.11                                                         | 3.72x10 <sup>-5</sup>                 |
| 21          | <i>CYYR1</i>    | rs222973             | 26800940        | T                   | 0.33                                 | 15                                            | 0.02                    | 7.91x10 <sup>-3</sup>                                        | 1.61x10 <sup>-3</sup>                 |
| 6           | <i>PHACTR2</i>  | rs9386042            | 144061147       | C                   | 0.25                                 | 10                                            | 3.44x10 <sup>-3</sup>   | 0.14                                                         | 4.26x10 <sup>-3</sup>                 |
| 14          | <i>DAAM1</i>    | rs17833769           | 58725214        | A                   | 0.23                                 | 10                                            | 7.32x10 <sup>-3</sup>   | 0.12                                                         | 7.16x10 <sup>-3</sup>                 |
| 15          | <i>SEMA6D</i>   | rs76739              | 45829438        | G                   | 0.41                                 | 22                                            | 2.76x10 <sup>-3</sup>   | 0.36                                                         | 7.81x10 <sup>-3</sup>                 |
| 15          | <i>IREB2</i>    | rs1964678            | 76541055        | A                   | 0.35                                 | 20                                            | 1.61x10 <sup>-3</sup>   | 0.72                                                         | 8.98x10 <sup>-3</sup>                 |
| 12          | <i>AMIGO2</i>   | rs2898002            | 45762494        | G                   | 0.29                                 | 22                                            | 0.01                    | 0.14                                                         | 0.01                                  |
| 15          | <i>IREB2</i>    | rs13180**            | 76576543        | C                   | 0.36                                 | 20                                            | 2.17x10 <sup>-3</sup>   | 0.71                                                         | 0.01                                  |
| 15          | <i>IREB2</i>    | rs965604             | 76576278        | G                   | 0.35                                 | 22                                            | 1.81x10 <sup>-3</sup>   | 0.88                                                         | 0.01                                  |
| 15          | <i>SEMA6D</i>   | rs11855291           | 45858167        | A                   | 0.23                                 | 13                                            | 8.28x10 <sup>-3</sup>   | 0.32                                                         | 0.02                                  |
| 15          | <i>SEMA6D</i>   | rs634939             | 45858069        | C                   | 0.41                                 | 16                                            | 0.01                    | 0.24                                                         | 0.02                                  |
| 12          | <i>ZNF84</i>    | rs7958575            | 132146663       | C                   | 0.27                                 | 14                                            | 0.01                    | 0.25                                                         | 0.02                                  |
| 21          | <i>CYYR1</i>    | rs222921             | 26806368        | G                   | 0.43                                 | 20                                            | 0.04                    | 0.07                                                         | 0.02                                  |
| 15          | <i>IREB2</i>    | rs12593229           | 76552345        | T                   | 0.35                                 | 21                                            | 2.95x10 <sup>-3</sup>   | 0.99                                                         | 0.02                                  |
| 6           | <i>PHACTR2</i>  | rs9321939            | 144096465       | C                   | 0.2                                  | 14                                            | 0.01                    | 0.31                                                         | 0.02                                  |
| 15          | <i>SEMA6D</i>   | rs8025861            | 45836323        | T                   | 0.41                                 | 19                                            | 7.42x10 <sup>-3</sup>   | 0.46                                                         | 0.02                                  |
| 14          | <i>DAAM1</i>    | rs965590             | 58818577        | C                   | 0.19                                 | 14                                            | 0.01                    | 0.28                                                         | 0.02                                  |
| 14          | <i>DAAM1</i>    | rs12888995           | 58796019        | A                   | 0.24                                 | 14                                            | 0.04                    | 0.10                                                         | 0.02                                  |
| 15          | <i>SEMA6D</i>   | rs568215             | 45850368        | T                   | 0.4                                  | 20                                            | 0.01                    | 0.37                                                         | 0.03                                  |
| 15          | <i>SEMA6D</i>   | rs765                | 45822977        | G                   | 0.47                                 | 23                                            | 5.40x10 <sup>-3</sup>   | 0.95                                                         | 0.03                                  |
| 15          | <i>SEMA6D</i>   | rs12898855           | 45801857        | C                   | 0.4                                  | 16                                            | 0.01                    | 0.43                                                         | 0.03                                  |
| 1           | <i>EIF2C4</i>   | rs727005             | 36053923        | G                   | 0.09                                 | 10                                            | 0.04                    | 0.13                                                         | 0.03                                  |
| 15          | <i>SEMA6D</i>   | rs586799             | 45812214        | G                   | 0.39                                 | 21                                            | 0.02                    | 0.27                                                         | 0.03                                  |
| 2           | <i>DYNC2LI1</i> | rs10205936           | 43844814        | T                   | 0.3                                  | 12                                            | 0.02                    | 0.36                                                         | 0.03                                  |
| 14          | <i>DAAM1</i>    | rs4898983            | 58828589        | C                   | 0.32                                 | 17                                            | 0.01                    | 0.62                                                         | 0.04                                  |
| 15          | <i>SEMA6D</i>   | rs532598             | 45845363        | A                   | 0.3                                  | 14                                            | 0.01                    | 0.68                                                         | 0.04                                  |
| 1           | <i>EFCAB7</i>   | rs217448             | 63782062        | G                   | 0.33                                 | 21                                            | 0.01                    | 0.67                                                         | 0.04                                  |
| 14          | <i>DAAM1</i>    | rs7150479            | 58795887        | G                   | 0.47                                 | 17                                            | 0.01                    | 0.81                                                         | 0.05                                  |
| 12          | <i>AMIGO2</i>   | rs7979883            | 45753285        | T                   | 0.3                                  | 19                                            | 0.03                    | 0.30                                                         | 0.06                                  |
| 12          | <i>AMIGO2</i>   | rs2269828            | 45757706        | A                   | 0.3                                  | 20                                            | 0.02                    | 0.50                                                         | 0.06                                  |
| 3           | <i>TIGIT</i>    | rs9825470            | 115511323       | G                   | 0.42                                 | 22                                            | 0.01                    | 0.97                                                         | 0.07                                  |
| 14          | <i>DAAM1</i>    | rs927964             | 58873466        | A                   | 0.32                                 | 17                                            | 0.03                    | 0.57                                                         | 0.08                                  |
| 6           | <i>PHACTR2</i>  | rs761627             | 144078630       | A                   | 0.49                                 | 25                                            | 0.02                    | 0.84                                                         | 0.08                                  |
| 6           | <i>PHACTR2</i>  | rs2073214            | 144123302       | T                   | 0.15                                 | 12                                            | 0.04                    | 0.46                                                         | 0.09                                  |
| 12          | <i>ZNF84</i>    | rs7133210            | 132129156       | T                   | 0.18                                 | 12                                            | 0.04                    | 0.52                                                         | 0.10                                  |
| 19          | <i>HIF3A</i>    | rs887946             | 51508628        | G                   | 0.33                                 | 17                                            | 0.04                    | 0.66                                                         | 0.12                                  |
| 21          | <i>CYYR1</i>    | rs2830271            | 26828867        | G                   | 0.25                                 | 10                                            | 0.03                    | 0.81                                                         | 0.13                                  |
| 8           | <i>LETM2</i>    | rs12678205           | 38359165        | G                   | 0.21                                 | 14                                            | 0.05                    | 0.60                                                         | 0.13                                  |
| 6           | <i>PHACTR2</i>  | rs722755             | 144125078       | A                   | 0.07                                 | 10                                            | 0.05                    | 0.81                                                         | 0.17                                  |
| 14          | <i>DAAM1</i>    | rs2099636            | 58838891        | A                   | 0.33                                 | 17                                            | 0.05                    | 0.99                                                         | 0.18                                  |
| 1           | <i>EFCAB7</i>   | rs17391823           | 63759453        | C                   | 0.33                                 | 23                                            | 0.05                    | 0.97                                                         | 0.19                                  |

\*Met Fisher combined P value threshold of <5.6x10<sup>-5</sup>\*\*GWAS data from British 1958 Birth Cohort Study for FEV<sub>1</sub> p=3x10<sup>-2</sup>

**Table S4: Pedigree-Based Association Test for ICGN Families for Pre-Bronchodilator FEV<sub>1</sub>**

| <i>SNP rs number</i> | <i>Minor allele</i> | <i>MAF</i> | <i>Informative families for PBAT analysis</i> | <i>ICGN p-value for pre-bronchodilator FEV<sub>1</sub></i> | <i>NETT/NAS p-value</i> | <i>EOCOPD p-value for pre-bronchodilator FEV<sub>1</sub></i> | <i>Combined p-value-Fisher method</i> |
|----------------------|---------------------|------------|-----------------------------------------------|------------------------------------------------------------|-------------------------|--------------------------------------------------------------|---------------------------------------|
| rs2568494            | A                   | 0.41       | 479                                           | 8.36x10 <sup>-4</sup>                                      | 4.4x10 <sup>-5</sup>    | 7.90x10 <sup>-3</sup>                                        | <b>7.68x10<sup>-8</sup></b>           |
| rs2656069            | C                   | 0.19       | 386                                           | 4.68x10 <sup>-3</sup>                                      | 1.03x10 <sup>-5</sup>   | 0.20                                                         | <b>1.81x10<sup>-6</sup></b>           |
| rs1964678            | A                   | 0.35       | 484                                           | 1.72x10 <sup>-3</sup>                                      | 1.61x10 <sup>-3</sup>   | 0.72                                                         | <b>2.00x10<sup>-4</sup></b>           |
| rs12593229           | T                   | 0.35       | 481                                           | 1.24x10 <sup>-3</sup>                                      | 2.95x10 <sup>-3</sup>   | 0.99                                                         | <b>3.34x10<sup>-4</sup></b>           |
| rs10851906           | G                   | 0.19       | 384                                           | 6.16x10 <sup>-3</sup>                                      | 2.46x10 <sup>-5</sup>   | 0.11                                                         | <b>2.98x10<sup>-6</sup></b>           |
| rs965604             | G                   | 0.35       | 483                                           | 1.38x10 <sup>-3</sup>                                      | 1.81x10 <sup>-3</sup>   | 0.88                                                         | <b>2.18x10<sup>-4</sup></b>           |
| rs13180              | C                   | 0.36       | 467                                           | 1.90x10 <sup>-3</sup>                                      | 2.17x10 <sup>-3</sup>   | 0.71                                                         | <b>2.79x10<sup>-4</sup></b>           |

**Table S5: Association in NETT/NAS and BEOCPD of *IREB2* SNPs Identified by Lung Cancer GWAS**

| SNP        | Location | NETT/NAS<br>p value   | EOCOPD p value for<br>post-bronchodilator<br>FEV <sub>1</sub> | <b>Combined p-value-<br/>Fisher method</b> |
|------------|----------|-----------------------|---------------------------------------------------------------|--------------------------------------------|
| rs17484235 | 76548469 | 1.16x10 <sup>-3</sup> | 6.55x10 <sup>-3</sup>                                         | 9.75x10 <sup>-5</sup>                      |
| rs2656052  | 76527987 | 1.81x10 <sup>-5</sup> | 0.01                                                          | 3.60x10 <sup>-6</sup>                      |

Table S6: Association Results for all 889 SNPs Tested in the NETT/NAS Cohort

| <i>Chr.</i> | <i>HUGO</i>     | <i>SNP</i> | <i>Location</i> | <i>Probe ID from gene expression dataset</i> | <i>P value</i>           |
|-------------|-----------------|------------|-----------------|----------------------------------------------|--------------------------|
| 9           | <i>PTCH1</i>    | rs16909859 | 97244613        | 209815                                       | 3.40x10 <sup>-6</sup>    |
| 15          | <i>IREB2</i>    | rs2656069  | 76532762        | 225892                                       | 1.03155x10 <sup>-5</sup> |
| 15          | <i>IREB2</i>    | rs10851906 | 76561731        | 225892                                       | 2.45534x10 <sup>-5</sup> |
| 15          | <i>IREB2</i>    | rs2568494  | 76528019        | 225892                                       | 4.40284x10 <sup>-5</sup> |
| 15          | <i>SEMA6D</i>   | rs7167021  | 45833273        | 226492                                       | 0.000191742              |
| 1           | <i>SYDE2</i>    | rs7511739  | 85395045        | 239847                                       | 0.00031479               |
| 15          | <i>SEMA6D</i>   | rs17388803 | 45814496        | 226492                                       | 0.000324633              |
| 15          | <i>SEMA6D</i>   | rs16960030 | 45838944        | 226492                                       | 0.000458457              |
| 15          | <i>IREB2</i>    | rs1964678  | 76541055        | 225892                                       | 0.001613314              |
| 15          | <i>IREB2</i>    | rs965604   | 76576278        | 225892                                       | 0.001805237              |
| 15          | <i>IREB2</i>    | rs13180    | 76576543        | 225892                                       | 0.002167198              |
| 15          | <i>SEMA6D</i>   | rs76739    | 45829438        | 226492                                       | 0.002757333              |
| 15          | <i>IREB2</i>    | rs12593229 | 76552345        | 225892                                       | 0.002949799              |
| 6           | <i>PHACTR2</i>  | rs9386042  | 144061147       | 227947                                       | 0.003442967              |
| 3           | <i>TIGIT</i>    | rs4682534  | 115516788       | 213156                                       | 0.004019466              |
| 1           | <i>ARHGAP29</i> | rs3789689  | 94458173        | 1558280                                      | 0.00404652               |
| 15          | <i>SEMA6D</i>   | rs765      | 45822977        | 226492                                       | 0.005397607              |
| 14          | <i>DAAM1</i>    | rs17833769 | 58725214        | 226666                                       | 0.007323409              |
| 15          | <i>SEMA6D</i>   | rs8025861  | 45836323        | 226492                                       | 0.007415389              |
| 15          | <i>SEMA6D</i>   | rs11855291 | 45858167        | 226492                                       | 0.008280308              |
| 21          | <i>CYYR1</i>    | rs17625613 | 26825130        | 228665                                       | 0.009813239              |
| 12          | <i>AMIGO2</i>   | rs2898002  | 45762494        | 222108                                       | 0.010032808              |
| 14          | <i>DAAM1</i>    | rs4898983  | 58828589        | 226666                                       | 0.010092594              |
| 6           | <i>PHACTR2</i>  | rs9321939  | 144096465       | 227947                                       | 0.010148547              |
| 15          | <i>SEMA6D</i>   | rs568215   | 45850368        | 226492                                       | 0.010175735              |
| 14          | <i>DAAM1</i>    | rs7150479  | 58795887        | 226666                                       | 0.010192679              |
| 15          | <i>SEMA6D</i>   | rs532598   | 45845363        | 226492                                       | 0.010484875              |
| 15          | <i>SEMA6D</i>   | rs634939   | 45858069        | 226492                                       | 0.011189204              |
| 12          | <i>ZNF84</i>    | rs7958575  | 132146663       | 228630                                       | 0.011421443              |
| 1           | <i>EFCAB7</i>   | rs217448   | 63782062        | 226800                                       | 0.011443478              |
| 12          | <i>KITLG</i>    | rs11610915 | 87426172        | 226534                                       | 0.011729391              |
| 3           | <i>TIGIT</i>    | rs9825470  | 115511323       | 213156                                       | 0.012349392              |
| 15          | <i>SEMA6D</i>   | rs12898855 | 45801857        | 226492                                       | 0.01254413               |
| 14          | <i>DAAM1</i>    | rs965590   | 58818577        | 226666                                       | 0.013441002              |
| 2           | <i>DYNC2LI1</i> | rs10205936 | 43844814        | 227148                                       | 0.015302231              |
| 1           | <i>ARHGAP29</i> | rs12077584 | 94443982        | 1558280                                      | 0.016443797              |
| 6           | <i>PHACTR2</i>  | rs761627   | 144078630       | 227947                                       | 0.019209569              |
| 15          | <i>SEMA6D</i>   | rs586799   | 45812214        | 226492                                       | 0.02006552               |
| 21          | <i>CYYR1</i>    | rs222973   | 26800940        | 228665                                       | 0.020939464              |
| 12          | <i>AMIGO2</i>   | rs2269828  | 45757706        | 222108                                       | 0.023818954              |
| 14          | <i>DAAM1</i>    | rs927964   | 58873466        | 226666                                       | 0.026059542              |
| 1           | <i>ARHGAP29</i> | rs6673184  | 94441895        | 1558280                                      | 0.026426997              |
| 6           | <i>PHACTR2</i>  | rs3811095  | 143970633       | 227947                                       | 0.026724192              |
| 6           | <i>CCDC90A</i>  | rs3757251  | 13899115        | 220094                                       | 0.026972738              |
| 21          | <i>CYYR1</i>    | rs2830273  | 26831258        | 228665                                       | 0.033481447              |
| 12          | <i>AMIGO2</i>   | rs7979883  | 45753285        | 222108                                       | 0.034269004              |
| 21          | <i>CYYR1</i>    | rs2830271  | 26828867        | 228665                                       | 0.034337196              |
| 21          | <i>CYYR1</i>    | rs17619458 | 26803092        | 228665                                       | 0.035161706              |
| 8           | <i>WHSC1L1</i>  | rs2932005  | 38351031        | 225318                                       | 0.035221034              |
| 14          | <i>DAAM1</i>    | rs12888995 | 58796019        | 226666                                       | 0.035717969              |
| 6           | <i>PHACTR2</i>  | rs17072830 | 143982460       | 227947                                       | 0.035805348              |
| 19          | <i>HIF3A</i>    | rs10414875 | 51514136        | 1555318                                      | 0.036684338              |
| 21          | <i>CYYR1</i>    | rs222954   | 26839258        | 228665                                       | 0.036872187              |
| 19          | <i>HIF3A</i>    | rs887946   | 51508628        | 1555318                                      | 0.038367475              |



| <i>Chr.</i> | <i>HUGO</i>     | <i>SNP</i> | <i>Location</i> | <i>Probe ID from gene expression dataset</i> | <i>P value</i> |
|-------------|-----------------|------------|-----------------|----------------------------------------------|----------------|
| 6           | <i>PHACTR2</i>  | rs2073214  | 144123302       | 227947                                       | 0.039351035    |
| 21          | <i>CYYR1</i>    | rs222921   | 26806368        | 228665                                       | 0.039896652    |
| 12          | <i>ZNF84</i>    | rs7133210  | 132129156       | 228630                                       | 0.039988404    |
| 9           | <i>PTCH1</i>    | rs2236405  | 97251393        | 209815                                       | 0.040380621    |
| 1           | <i>EIF2C4</i>   | rs727005   | 36053923        | 227930                                       | 0.042076479    |
| 14          | <i>DAAM1</i>    | rs2099636  | 58838891        | 226666                                       | 0.042087954    |
| 10          | <i>ZNF248</i>   | rs200932   | 38168774        | 213269                                       | 0.042393791    |
| 8           | <i>CSPP1</i>    | rs16933170 | 68192032        | 227105                                       | 0.043358642    |
| 8           | <i>CSPP1</i>    | rs16933182 | 68236691        | 227105                                       | 0.044325008    |
| 6           | <i>KIAA0240</i> | rs9471915  | 42862590        | 1559964                                      | 0.047468503    |
| 21          | <i>CYYR1</i>    | rs17536311 | 26818798        | 228665                                       | 0.047642786    |
| 1           | <i>ARHGAP29</i> | rs6682149  | 94448856        | 1558280                                      | 0.047820355    |
| 19          | <i>HIF3A</i>    | rs3752207  | 51507545        | 1555318                                      | 0.047841623    |
| 1           | <i>ITGB3BP</i>  | rs17391823 | 63759453        | 226800                                       | 0.048031994    |
| 8           | <i>LETM2</i>    | rs12678205 | 38359165        | 225318                                       | 0.048471569    |
| 19          | <i>HIF3A</i>    | rs17173172 | 51507137        | 1555318                                      | 0.049176999    |
| 6           | <i>PHACTR2</i>  | rs722755   | 144125078       | 227947                                       | 0.049663881    |
| 1           | <i>SYDE2</i>    | rs817399   | 85386139        | 239847                                       | 0.050744811    |
| 6           | <i>PHACTR2</i>  | rs17073064 | 144141568       | 227947                                       | 0.054467718    |
| 9           | <i>MAK10</i>    | rs11789292 | 87804682        | 220925                                       | 0.059103457    |
| 1           | <i>SYDE2</i>    | rs12026642 | 85388277        | 239847                                       | 0.059295531    |
| 2           | <i>DYNC2LI1</i> | rs3762571  | 43853238        | 227148                                       | 0.059736156    |
| 4           | <i>HPGD</i>     | rs2555632  | 175670737       | 211548                                       | 0.061500595    |
| 6           | <i>PHACTR2</i>  | rs2488102  | 144074515       | 227947                                       | 0.064211572    |
| 12          | <i>ZNF84</i>    | rs7961667  | 132128064       | 228630                                       | 0.065952402    |
| 6           | <i>PHACTR2</i>  | rs9484805  | 144099809       | 227947                                       | 0.070496091    |
| 14          | <i>SLC25A29</i> | rs3742379  | 99829030        | 224711                                       | 0.074489048    |
| 14          | <i>DAAM1</i>    | rs1957408  | 58870074        | 226666                                       | 0.078930955    |
| 14          | <i>DAAM1</i>    | rs17255507 | 58806410        | 226666                                       | 0.080169135    |
| 14          | <i>DAAM1</i>    | rs17833798 | 58753334        | 226666                                       | 0.081382087    |
| 9           | <i>PTCH1</i>    | rs357563   | 97244020        | 209815                                       | 0.081610184    |
| 1           | <i>SYDE2</i>    | rs7535388  | 85388784        | 239847                                       | 0.084193749    |
| 6           | <i>PHACTR2</i>  | rs6937056  | 144095901       | 227947                                       | 0.084872423    |
| 19          | <i>ZNF44</i>    | rs2458998  | 12231583        | 215359                                       | 0.085160723    |
| 6           | <i>PHACTR2</i>  | rs7772565  | 144034763       | 227947                                       | 0.085455948    |
| 14          | <i>DAAM1</i>    | rs1252992  | 58735039        | 226666                                       | 0.090801652    |
| 6           | <i>FAM162B</i>  | rs1165552  | 117184072       | 228875                                       | 0.091989436    |
| 14          | <i>DAAM1</i>    | rs17096088 | 58861960        | 226666                                       | 0.09214588     |
| 14          | <i>DAAM1</i>    | rs11158252 | 58795659        | 226666                                       | 0.093557295    |
| 21          | <i>CYYR1</i>    | rs1395053  | 26853119        | 228665                                       | 0.094022735    |
| 6           | <i>CCDC90A</i>  | rs6940337  | 13897316        | 220094                                       | 0.095270746    |
| 6           | <i>PHACTR2</i>  | rs13214849 | 144016742       | 227947                                       | 0.097485937    |
| 13          | <i>TNFRSF19</i> | rs9580701  | 23103412        | 227812                                       | 0.097698133    |
| 17          | <i>ZNF207</i>   | rs2286645  | 27720405        | 228157                                       | 0.09784967     |
| 13          | <i>RCBTB1</i>   | rs9535262  | 49032695        | 218352                                       | 0.100687293    |
| 15          | <i>SEMA6D</i>   | rs3985863  | 45820660        | 226492                                       | 0.101694681    |
| 19          | <i>HIF3A</i>    | rs4803932  | 51537918        | 1555318                                      | 0.102708707    |
| 6           | <i>COQ3</i>     | rs4144165  | 99953981        | 212179                                       | 0.105197151    |
| 6           | <i>PHACTR2</i>  | rs2295202  | 144136641       | 227947                                       | 0.106926076    |
| 12          | <i>ZNF84</i>    | rs11297    | 132149732       | 228630                                       | 0.107968167    |
| 19          | <i>HIF3A</i>    | rs10411556 | 51516744        | 1555318                                      | 0.108343934    |
| 21          | <i>CYYR1</i>    | rs191996   | 26796014        | 228665                                       | 0.108469775    |
| 14          | <i>DAAM1</i>    | rs721069   | 58757058        | 226666                                       | 0.108941033    |
| 10          | <i>ZNF248</i>   | rs200936   | 38174941        | 213269                                       | 0.109763561    |
| 6           | <i>QKI</i>      | rs2759386  | 163764382       | 212263                                       | 0.113432183    |
| 14          | <i>DAAM1</i>    | rs17833810 | 58767499        | 226666                                       | 0.114189114    |

| <i>Chr.</i> | <i>HUGO</i> | <i>SNP</i> | <i>Location</i> | <i>Probe ID from gene expression dataset</i> | <i>P value</i> |
|-------------|-------------|------------|-----------------|----------------------------------------------|----------------|
| 21          | CYYR1       | rs222935   | 26821069        | 228665                                       | 0.115024138    |
| 8           | RUNX1T1     | rs10098853 | 93037086        | 205528                                       | 0.116332199    |
| 21          | CYYR1       | rs219632   | 26789430        | 228665                                       | 0.117895461    |
| 10          | ZNF248      | rs200937   | 38175778        | 213269                                       | 0.118083083    |
| 1           | EIF2C4      | rs7525882  | 36080484        | 227930                                       | 0.118630291    |
| 4           | HPGD        | rs12644138 | 175674467       | 211548                                       | 0.119421153    |
| 19          | HIF3A       | rs8101480  | 51507339        | 1555318                                      | 0.122255472    |
| 17          | C17ORF73    | rs17564062 | 46188680        | 242389                                       | 0.122303448    |
| 1           | SYDE2       | rs817403   | 85389939        | 239847                                       | 0.122701786    |
| 1           | EFCAB7      | rs217451   | 63776221        | 226800                                       | 0.122758255    |
| 2           | PLEKHH2     | rs4953011  | 43827862        | 227148                                       | 0.123033914    |
| 8           | CSPP1       | rs1808140  | 68265531        | 227105                                       | 0.123469362    |
| 8           | CSPP1       | rs6998170  | 68187128        | 227105                                       | 0.123469362    |
| 14          | SLC25A29    | rs11848624 | 99823495        | 224711                                       | 0.124037428    |
| 13          | RCBTB1      | rs2296502  | 49012982        | 218352                                       | 0.124433295    |
| 1           | EFCAB7      | rs217463   | 63814375        | 226800                                       | 0.124896011    |
| 1           | ARHGAP29    | rs17399943 | 94473272        | 1558280                                      | 0.125312358    |
| 19          | HIF3A       | rs757638   | 51503966        | 1555318                                      | 0.12910219     |
| 2           | PLEKHH2     | rs7603323  | 43813051        | 227148                                       | 0.12944055     |
| 13          | RCBTB1      | rs2274278  | 49024383        | 218352                                       | 0.12993422     |
| 4           | SLIT2       | rs1457916  | 20234787        | 228850                                       | 0.130568842    |
| 6           | COQ3        | rs3811072  | 99958698        | 212179                                       | 0.130880505    |
| 8           | CSPP1       | rs2358043  | 68259006        | 227105                                       | 0.131442282    |
| 1           | EFCAB7      | rs170090   | 63807735        | 226800                                       | 0.133475291    |
| 8           | WHSC1L1     | rs2280847  | 38295344        | 225318                                       | 0.133733288    |
| 12          | AMIGO2      | rs854889   | 45757304        | 222108                                       | 0.13553911     |
| 6           | PHACTR2     | rs10484828 | 144077122       | 227947                                       | 0.139757775    |
| 5           | SLC12A2     | rs17607500 | 127496887       | 225835                                       | 0.142683126    |
| 2           | PLEKHH2     | rs1432280  | 43766065        | 227148                                       | 0.144190611    |
| 1           | ARHGAP29    | rs1411701  | 94407616        | 1558280                                      | 0.145656982    |
| 8           | WHSC1L1     | rs10102341 | 38280626        | 225318                                       | 0.148237161    |
| 8           | WHSC1L1     | rs11774214 | 38331570        | 225318                                       | 0.148237161    |
| 14          | DAAM1       | rs17096179 | 58908520        | 226666                                       | 0.148387109    |
| 6           | PHACTR2     | rs6570567  | 143973425       | 227947                                       | 0.149291334    |
| 9           | MAK10       | rs1328923  | 87808282        | 220925                                       | 0.149823813    |
| 6           | PHACTR2     | rs1015339  | 144076541       | 227947                                       | 0.149939954    |
| 4           | KIT         | rs11721352 | 55250635        | 205051                                       | 0.150132909    |
| 6           | PHACTR2     | rs9496711  | 143987327       | 227947                                       | 0.150414565    |
| 21          | CYYR1       | rs2830235  | 26755620        | 228665                                       | 0.150598842    |
| 4           | KIT         | rs4355454  | 55305605        | 205051                                       | 0.151207455    |
| 21          | CYYR1       | rs222977   | 26802387        | 228665                                       | 0.151599579    |
| 14          | SLC25A29    | rs1059263  | 99839120        | 224711                                       | 0.15254143     |
| 4           | HPGD        | rs3756273  | 175681812       | 211548                                       | 0.153000191    |
| 13          | RCBTB1      | rs7317140  | 49015037        | 218352                                       | 0.154117721    |
| 2           | DYNC2LI1    | rs7601418  | 43848995        | 227148                                       | 0.156737105    |
| 8           | WHSC1L1     | rs10100894 | 38262514        | 225318                                       | 0.157252896    |
| 14          | DAAM1       | rs1008734  | 58809703        | 226666                                       | 0.158948842    |
| 6           | PHACTR2     | rs9390123  | 143985007       | 227947                                       | 0.159407769    |
| 9           | PTCH1       | rs4448343  | 97306191        | 209815                                       | 0.160918986    |
| 13          | RCBTB1      | rs7995006  | 49011730        | 218352                                       | 0.164834939    |
| 12          | ZNF84       | rs3805728  | 132143609       | 228630                                       | 0.166601932    |
| 21          | CYYR1       | rs2830259  | 26791471        | 228665                                       | 0.16800627     |
| 12          | AMIGO2      | rs2106928  | 45761112        | 222108                                       | 0.168675133    |
| 6           | PHACTR2     | rs9386041  | 144026546       | 227947                                       | 0.172439856    |
| 15          | GOLGA8B     | rs16954442 | 32606319        | 213650                                       | 0.172463373    |
| 7           | RSBN1L      | rs10263369 | 77244340        | 228963                                       | 0.172655993    |

| <i>Chr.</i> | <i>HUGO</i>       | <i>SNP</i> | <i>Location</i> | <i>Probe ID from gene expression dataset</i> | <i>P value</i> |
|-------------|-------------------|------------|-----------------|----------------------------------------------|----------------|
| 8           | <i>RUNX1T1</i>    | rs11985869 | 93035527        | 205528                                       | 0.173174446    |
| 12          | <i>KITLG</i>      | rs1492354  | 87472109        | 226534                                       | 0.178629245    |
| 12          | <i>RECQL</i>      | rs10161132 | 21518554        | 213878                                       | 0.17908092     |
| 1           | <i>ARHGAP29</i>   | rs1411698  | 94458698        | 1558280                                      | 0.179673714    |
| 4           | <i>SLIT2</i>      | rs17544103 | 20228988        | 228850                                       | 0.182473485    |
| 18          | <i>POLI</i>       | rs596986   | 50075498        | 238992                                       | 0.182738321    |
| 8           | <i>WHSC1L1</i>    | rs2234549  | 38307170        | 225318                                       | 0.18352309     |
| 2           | <i>PLEKHH2</i>    | rs17031287 | 43773525        | 227148                                       | 0.184278411    |
| 3           | <i>INTERGENIC</i> | rs2688464  | 196906558       | 1557293                                      | 0.185585869    |
| 14          | <i>DAAM1</i>      | rs941882   | 58861382        | 226666                                       | 0.185634832    |
| 6           | <i>COQ3</i>       | rs9376137  | 99948777        | 212179                                       | 0.187330503    |
| 1           | <i>EIF2C4</i>     | rs11264211 | 36043194        | 227930                                       | 0.187341336    |
| 6           | <i>FAM162B</i>    | rs647689   | 117187923       | 228875                                       | 0.189700545    |
| 1           | <i>EFCAB7</i>     | rs1740397  | 63804871        | 226800                                       | 0.193794173    |
| 6           | <i>HMGN3</i>      | rs9343886  | 79983800        | 209377                                       | 0.197686167    |
| 6           | <i>PHACTR2</i>    | rs9390143  | 144181078       | 227947                                       | 0.197727172    |
| 14          | <i>DAAM1</i>      | rs8003365  | 58852266        | 226666                                       | 0.197832946    |
| 19          | <i>ZNF30</i>      | rs1811     | 40126078        | 232014                                       | 0.198422155    |
| 17          | <i>C17ORF73</i>   | rs2159432  | 46191051        | 242389                                       | 0.201183547    |
| 8           | <i>PPAPDC1B</i>   | rs7845911  | 38254569        | 225318                                       | 0.201380798    |
| 1           | <i>ARHGAP29</i>   | rs1048866  | 94411299        | 1558280                                      | 0.204721434    |
| 13          | <i>RCBTB1</i>     | rs729051   | 49018210        | 218352                                       | 0.20591582     |
| 21          | <i>CYYR1</i>      | rs222931   | 26819270        | 228665                                       | 0.207208624    |
| 21          | <i>CYYR1</i>      | rs2830236  | 26756495        | 228665                                       | 0.208164559    |
| 6           | <i>PHACTR2</i>    | rs1014900  | 144069276       | 227947                                       | 0.208318832    |
| 4           | <i>HPGD</i>       | rs17060521 | 175647010       | 211548                                       | 0.213757748    |
| 21          | <i>CYYR1</i>      | rs2830266  | 26800371        | 228665                                       | 0.215012818    |
| 6           | <i>QKI</i>        | rs803612   | 163778227       | 212263                                       | 0.215382267    |
| 12          | <i>KITLG</i>      | rs1022034  | 87442874        | 226534                                       | 0.219839621    |
| 15          | <i>IREB2</i>      | rs12916396 | 76531579        | 225892                                       | 0.220543551    |
| 1           | <i>ARHGAP29</i>   | rs4847296  | 94463383        | 1558280                                      | 0.220888364    |
| 21          | <i>CYYR1</i>      | rs222961   | 26847600        | 228665                                       | 0.220989705    |
| 4           | <i>KIT</i>        | rs4406072  | 55305417        | 205051                                       | 0.222710872    |
| 14          | <i>DAAM1</i>      | rs8022614  | 58859480        | 226666                                       | 0.225078069    |
| 6           | <i>HMGN3</i>      | rs4706754  | 79969588        | 209377                                       | 0.229520511    |
| 6           | <i>PHACTR2</i>    | rs12193494 | 143979636       | 227947                                       | 0.229950619    |
| 17          | <i>C17ORF73</i>   | rs1984555  | 46191196        | 242389                                       | 0.230326388    |
| 7           | <i>TMEM60</i>     | rs6465825  | 77254375        | 228963                                       | 0.231356743    |
| 19          | <i>HIF3A</i>      | rs731293   | 51503655        | 1555318                                      | 0.231377279    |
| 1           | <i>EIF2C4</i>     | rs515346   | 36048224        | 227930                                       | 0.233954606    |
| 12          | <i>KITLG</i>      | rs1492348  | 87460779        | 226534                                       | 0.236382493    |
| 6           | <i>FAM162B</i>    | rs9374622  | 117178076       | 228875                                       | 0.236615558    |
| 17          | <i>CROP</i>       | rs4794179  | 46148229        | 208835                                       | 0.238317001    |
| 8           | <i>PPAPDC1B</i>   | rs1488934  | 38252769        | 225318                                       | 0.238578551    |
| 6           | <i>HMGN3</i>      | rs2322216  | 79980383        | 209377                                       | 0.23929758     |
| 21          | <i>CYYR1</i>      | rs8128305  | 26783864        | 228665                                       | 0.240950953    |
| 6           | <i>PHACTR2</i>    | rs10457752 | 144073101       | 227947                                       | 0.24439041     |
| 13          | <i>RCBTB1</i>     | rs17073188 | 49042198        | 218352                                       | 0.244936163    |
| 17          | <i>ZNF207</i>     | rs11080180 | 27707111        | 228157                                       | 0.245349003    |
| 6           | <i>PHACTR2</i>    | rs9403521  | 144035892       | 227947                                       | 0.24570547     |
| 7           | <i>RP9</i>        | rs10281469 | 33110798        | 227852                                       | 0.249444724    |
| 6           | <i>SFRS18</i>     | rs9385739  | 99960448        | 212179                                       | 0.249866647    |
| 1           | <i>LEPR</i>       | rs11585329 | 65846402        | 227095                                       | 0.250111547    |
| 18          | <i>POLI</i>       | rs652994   | 50080235        | 238992                                       | 0.251160777    |
| 13          | <i>RCBTB1</i>     | rs7337571  | 49052554        | 218352                                       | 0.253167161    |
| 6           | <i>PHACTR2</i>    | rs9321941  | 144106597       | 227947                                       | 0.254274521    |

| <i>Chr.</i> | <i>HUGO</i>     | <i>SNP</i> | <i>Location</i> | <i>Probe ID from gene expression dataset</i> | <i>P value</i> |
|-------------|-----------------|------------|-----------------|----------------------------------------------|----------------|
| 12          | <i>KITLG</i>    | rs10506957 | 87491138        | 226534                                       | 0.254472999    |
| 19          | <i>ZNF30</i>    | rs2651109  | 40126352        | 232014                                       | 0.256745305    |
| 19          | <i>ZNF30</i>    | rs1345658  | 40126846        | 232014                                       | 0.257847668    |
| 6           | <i>PHACTR2</i>  | rs12196139 | 144006085       | 227947                                       | 0.260195501    |
| 6           | <i>PHACTR2</i>  | rs926794   | 144181257       | 227947                                       | 0.260912113    |
| 6           | <i>FAM162B</i>  | rs686708   | 117198376       | 228875                                       | 0.261963544    |
| 13          | <i>RCBTB1</i>   | rs2274281  | 49024668        | 218352                                       | 0.262004367    |
| 12          | <i>RECQL</i>    | rs997820   | 21518824        | 213878                                       | 0.262750812    |
| 14          | <i>DAAM1</i>    | rs12433411 | 58763260        | 226666                                       | 0.263610475    |
| 6           | <i>CCDC90A</i>  | rs3823246  | 13902500        | 220094                                       | 0.264018924    |
| 21          | <i>CYYR1</i>    | rs1847861  | 26844063        | 228665                                       | 0.264174626    |
| 15          | <i>LPCAT4</i>   | rs8037671  | 32456454        | 213650                                       | 0.264978286    |
| 4           | <i>HPGD</i>     | rs2303520  | 175653541       | 211548                                       | 0.265620858    |
| 14          | <i>DAAM1</i>    | rs17255395 | 58739147        | 226666                                       | 0.268054906    |
| 14          | <i>DAAM1</i>    | rs10143918 | 58842961        | 226666                                       | 0.268321507    |
| 7           | <i>RP9</i>      | rs12667900 | 33098254        | 227852                                       | 0.268766327    |
| 12          | <i>KITLG</i>    | rs1703081  | 87475518        | 226534                                       | 0.268973624    |
| 10          | <i>ZNF248</i>   | rs1208642  | 38168589        | 213269                                       | 0.270241293    |
| 19          | <i>ZNF302</i>   | rs17718247 | 39873192        | 218490                                       | 0.271428046    |
| 1           | <i>LEPR</i>     | rs6662904  | 65770328        | 227095                                       | 0.271570893    |
| 1           | <i>EFCAB7</i>   | rs217473   | 63802436        | 226800                                       | 0.271908646    |
| 14          | <i>DAAM1</i>    | rs17096074 | 58859645        | 226666                                       | 0.271922494    |
| 13          | <i>RCBTB1</i>   | rs4941648  | 49054166        | 218352                                       | 0.272063626    |
| 21          | <i>CYYR1</i>    | rs222925   | 26809366        | 228665                                       | 0.272358279    |
| 6           | <i>PHACTR2</i>  | rs7745196  | 143999273       | 227947                                       | 0.276569185    |
| 10          | <i>ZNF248</i>   | rs200914   | 38157697        | 213269                                       | 0.277913239    |
| 13          | <i>RCBTB1</i>   | rs17073145 | 49032100        | 218352                                       | 0.279405945    |
| 5           | <i>SLC12A2</i>  | rs790154   | 127529134       | 225835                                       | 0.282623568    |
| 2           | <i>PLEKHH2</i>  | rs2288710  | 43823791        | 227148                                       | 0.283290554    |
| 21          | <i>CYYR1</i>    | rs219645   | 26766282        | 228665                                       | 0.283503614    |
| 1           | <i>EIF2C4</i>   | rs4652895  | 36089158        | 227930                                       | 0.283846542    |
| 12          | <i>AMIGO2</i>   | rs7963939  | 45751349        | 222108                                       | 0.285561758    |
| 21          | <i>CYYR1</i>    | rs2830284  | 26859410        | 228665                                       | 0.288223643    |
| 4           | <i>HPGD</i>     | rs9312555  | 175648528       | 211548                                       | 0.289391737    |
| 21          | <i>CYYR1</i>    | rs17002187 | 26762664        | 228665                                       | 0.291818961    |
| 10          | <i>PPP1R3C</i>  | rs10509632 | 93374298        | 204284                                       | 0.292702187    |
| 7           | <i>RP9</i>      | rs6980186  | 33103190        | 227852                                       | 0.292823687    |
| 15          | <i>LPCAT4</i>   | rs4299123  | 32454055        | 213650                                       | 0.296720184    |
| 10          | <i>ZNF248</i>   | rs10827834 | 38190470        | 213269                                       | 0.296993929    |
| 14          | <i>DAAM1</i>    | rs7153158  | 58784239        | 226666                                       | 0.297459812    |
| 13          | <i>TNFRSF19</i> | rs932880   | 23086039        | 227812                                       | 0.29980276     |
| 10          | <i>ZNF248</i>   | rs12256794 | 38179120        | 213269                                       | 0.299936322    |
| 1           | <i>LEPR</i>     | rs11587159 | 65759793        | 227095                                       | 0.30053626     |
| 9           | <i>MAK10</i>    | rs17353510 | 87801499        | 220925                                       | 0.303502649    |
| 1           | <i>EFCAB7</i>   | rs217478   | 63763855        | 226800                                       | 0.303850141    |
| 6           | <i>PHACTR2</i>  | rs9496767  | 144128087       | 227947                                       | 0.304028437    |
| 4           | <i>HPGD</i>     | rs7349744  | 175660747       | 211548                                       | 0.304999055    |
| 21          | <i>CYYR1</i>    | rs7510108  | 26803786        | 228665                                       | 0.305995909    |
| 12          | <i>RECQL</i>    | rs6499     | 21515813        | 213878                                       | 0.309978167    |
| 2           | <i>PLEKHH2</i>  | rs11885893 | 43800822        | 227148                                       | 0.310165804    |
| 12          | <i>KITLG</i>    | rs10777131 | 87486142        | 226534                                       | 0.310429846    |
| 13          | <i>RCBTB1</i>   | rs1925742  | 49007585        | 218352                                       | 0.31043741     |
| 12          | <i>RECQL</i>    | rs1029931  | 21520580        | 213878                                       | 0.310953495    |
| 4           | <i>KIT</i>      | rs17084745 | 55302601        | 205051                                       | 0.3121608      |
| 21          | <i>CYYR1</i>    | rs2830257  | 26790460        | 228665                                       | 0.312475158    |
| 10          | <i>ZNF248</i>   | rs1779089  | 38166711        | 213269                                       | 0.317407933    |

| <i>Chr.</i> | <i>HUGO</i>       | <i>SNP</i> | <i>Location</i> | <i>Probe ID from gene expression dataset</i> | <i>P value</i> |
|-------------|-------------------|------------|-----------------|----------------------------------------------|----------------|
| 12          | <i>PYROXD1</i>    | rs11046075 | 21512686        | 213878                                       | 0.318653588    |
| 6           | <i>PHACTR2</i>    | rs2073215  | 144123461       | 227947                                       | 0.319421545    |
| 5           | <i>SLC12A2</i>    | rs12189448 | 127533047       | 225835                                       | 0.321042369    |
| 2           | <i>DYNC2LI1</i>   | rs10495907 | 43852230        | 227148                                       | 0.323277415    |
| 1           | <i>EFCAB7</i>     | rs217454   | 63771675        | 226800                                       | 0.323316519    |
| 13          | <i>RCBTB1</i>     | rs7996012  | 49053640        | 218352                                       | 0.323471176    |
| 4           | <i>HPGD</i>       | rs2612658  | 175664894       | 211548                                       | 0.326883795    |
| 13          | <i>RCBTB1</i>     | rs9568256  | 49029076        | 218352                                       | 0.327546529    |
| 6           | <i>PHACTR2</i>    | rs7760144  | 144072540       | 227947                                       | 0.327590882    |
| 4           | <i>SLIT2</i>      | rs8663     | 20230788        | 228850                                       | 0.329562724    |
| 1           | <i>ARHGAP29</i>   | rs1999271  | 94473797        | 1558280                                      | 0.335776243    |
| 4           | <i>HPGD</i>       | rs8752     | 175649052       | 211548                                       | 0.338770856    |
| 2           | <i>PLEKHH2</i>    | rs6716551  | 43789229        | 227148                                       | 0.339026804    |
| 3           | <i>C3ORF50</i>    | rs12374050 | 170026871       | 1558411                                      | 0.341835482    |
| 1           | <i>EIF2C4</i>     | rs671944   | 36067219        | 227930                                       | 0.34198152     |
| 5           | <i>SLC12A2</i>    | rs790155   | 127526279       | 225835                                       | 0.342928538    |
| 6           | <i>FLJ38717</i>   | rs2150911  | 42857066        | 1559964                                      | 0.343883999    |
| 8           | <i>WHSC1L1</i>    | rs7821392  | 38344506        | 225318                                       | 0.346873567    |
| 13          | <i>TNFRSF19</i>   | rs7329483  | 23140801        | 227812                                       | 0.34796224     |
| 2           | <i>PLEKHH2</i>    | rs2163652  | 43753422        | 227148                                       | 0.348767657    |
| 4           | <i>KIT</i>        | rs6554198  | 55216917        | 205051                                       | 0.350348305    |
| 17          | <i>C17ORF73</i>   | rs9747888  | 46192334        | 242389                                       | 0.350900997    |
| 6           | <i>PHACTR2</i>    | rs2051008  | 144064405       | 227947                                       | 0.353579329    |
| 14          | <i>DAAM1</i>      | rs1957406  | 58859031        | 226666                                       | 0.355435787    |
| 13          | <i>RCBTB1</i>     | rs1359541  | 49056940        | 218352                                       | 0.355550061    |
| 3           | <i>TIGIT</i>      | rs11921850 | 115514550       | 213156                                       | 0.355964046    |
| 15          | <i>INTERGENIC</i> | rs687566   | 45818573        | 226492                                       | 0.356886618    |
| 8           | <i>WHSC1L1</i>    | rs11777811 | 38340625        | 225318                                       | 0.357722246    |
| 4           | <i>KIT</i>        | rs2237033  | 55224027        | 205051                                       | 0.357911769    |
| 10          | <i>ZNF248</i>     | rs1208664  | 38181742        | 213269                                       | 0.359118101    |
| 1           | <i>LEPR</i>       | rs1171279  | 65761081        | 227095                                       | 0.359212364    |
| 8           | <i>WHSC1L1</i>    | rs10101168 | 38312675        | 225318                                       | 0.360605135    |
| 15          | <i>SEMA6D</i>     | rs501916   | 45840521        | 226492                                       | 0.360948713    |
| 10          | <i>ZNF248</i>     | rs1208723  | 38156172        | 213269                                       | 0.361806139    |
| 5           | <i>INTERGENIC</i> | rs1864922  | 127448599       | 225835                                       | 0.364276571    |
| 12          | <i>KITLG</i>      | rs869408   | 87498886        | 226534                                       | 0.364594191    |
| 2           | <i>PLEKHH2</i>    | rs17413944 | 43738359        | 227148                                       | 0.365194382    |
| 19          | <i>HIF3A</i>      | rs16980431 | 51498097        | 1555318                                      | 0.366208586    |
| 21          | <i>CYYR1</i>      | rs4817119  | 26779877        | 228665                                       | 0.368733128    |
| 14          | <i>SLC25A29</i>   | rs8007427  | 99841325        | 224711                                       | 0.368758306    |
| 1           | <i>ARHGAP29</i>   | rs3789687  | 94466291        | 1558280                                      | 0.368890362    |
| 6           | <i>QKI</i>        | rs13207769 | 163869017       | 212263                                       | 0.371904357    |
| 2           | <i>PLEKHH2</i>    | rs719424   | 43762555        | 227148                                       | 0.372539948    |
| 13          | <i>RCBTB1</i>     | rs9568269  | 49056143        | 218352                                       | 0.375757182    |
| 14          | <i>SLC25A29</i>   | rs4905945  | 99847546        | 224711                                       | 0.376873175    |
| 4           | <i>KIT</i>        | rs2237034  | 55223410        | 205051                                       | 0.382006036    |
| 8           | <i>CSPP1</i>      | rs12681862 | 68204344        | 227105                                       | 0.382722739    |
| 2           | <i>PLEKHH2</i>    | rs6544691  | 43789734        | 227148                                       | 0.384859876    |
| 1           | <i>ARHGAP29</i>   | rs12724116 | 94462322        | 1558280                                      | 0.38509949     |
| 12          | <i>RECQL</i>      | rs10841830 | 21516764        | 213878                                       | 0.38700695     |
| 8           | <i>WHSC1L1</i>    | rs2234555  | 38297924        | 225318                                       | 0.390479153    |
| 14          | <i>DAAM1</i>      | rs1252915  | 58735874        | 226666                                       | 0.392584765    |
| 6           | <i>PHACTR2</i>    | rs12213878 | 143988707       | 227947                                       | 0.39672528     |
| 13          | <i>RCBTB1</i>     | rs7322971  | 49025720        | 218352                                       | 0.397498671    |
| 10          | <i>ZNF248</i>     | rs1208650  | 38173548        | 213269                                       | 0.398052245    |
| 21          | <i>CYYR1</i>      | rs2830243  | 26767851        | 228665                                       | 0.398320333    |

| <i>Chr.</i> | <i>HUGO</i>       | <i>SNP</i> | <i>Location</i> | <i>Probe ID from gene expression dataset</i> | <i>P value</i> |
|-------------|-------------------|------------|-----------------|----------------------------------------------|----------------|
| 6           | <i>PHACTR2</i>    | rs11155313 | 144003270       | 227947                                       | 0.398592168    |
| 6           | <i>COQ3</i>       | rs9402748  | 99949426        | 212179                                       | 0.399200392    |
| 6           | <i>PHACTR2</i>    | rs11155319 | 144051933       | 227947                                       | 0.400193655    |
| 2           | <i>PLEKHH2</i>    | rs919688   | 43738264        | 227148                                       | 0.402719662    |
| 14          | <i>SLC25A29</i>   | rs3825555  | 99828799        | 224711                                       | 0.403617289    |
| 6           | <i>FAM162B</i>    | rs654128   | 117193071       | 228875                                       | 0.404995933    |
| 1           | <i>ARHGAP29</i>   | rs10782980 | 94470337        | 1558280                                      | 0.406138741    |
| 6           | <i>HMG3</i>       | rs12191682 | 80000505        | 209377                                       | 0.407515985    |
| 6           | <i>PHACTR2</i>    | rs17072918 | 144061598       | 227947                                       | 0.408953423    |
| 8           | <i>RUNX1T1</i>    | rs4500123  | 93039329        | 205528                                       | 0.409198832    |
| 13          | <i>RCBTB1</i>     | rs7328860  | 49027122        | 218352                                       | 0.41026187     |
| 9           | <i>PTCH1</i>      | rs574688   | 97279011        | 209815                                       | 0.413889723    |
| 4           | <i>KIT</i>        | rs3822214  | 55288221        | 205051                                       | 0.415468897    |
| 6           | <i>PHACTR2</i>    | rs6907742  | 144057326       | 227947                                       | 0.416933075    |
| 10          | <i>INTERGENIC</i> | rs12262390 | 94436103        | 215933                                       | 0.417204775    |
| 1           | <i>MASP2</i>      | rs7548659  | 11030026        | 229111                                       | 0.41778984     |
| 6           | <i>QKI</i>        | rs9346960  | 163805280       | 212263                                       | 0.4180383      |
| 6           | <i>QKI</i>        | rs3857504  | 163753600       | 212263                                       | 0.418742876    |
| 1           | <i>EIF2C4</i>     | rs16822342 | 36047775        | 227930                                       | 0.4205922      |
| 11          | <i>CREBZF</i>     | rs17811094 | 85058218        | 225595                                       | 0.421826304    |
| 13          | <i>RCBTB1</i>     | rs3751383  | 49021650        | 218352                                       | 0.422314672    |
| 12          | <i>KITLG</i>      | rs11104940 | 87456855        | 226534                                       | 0.425530045    |
| 6           | <i>PHACTR2</i>    | rs12660418 | 144144221       | 227947                                       | 0.425531033    |
| 2           | <i>PLEKHH2</i>    | rs10514787 | 43784213        | 227148                                       | 0.427992722    |
| 7           | <i>RSBN1L</i>     | rs3944103  | 77250425        | 228963                                       | 0.429084534    |
| 8           | <i>WHSC1L1</i>    | rs1599918  | 38283444        | 225318                                       | 0.429337359    |
| 19          | <i>ZNF302</i>     | rs2305762  | 39861380        | 218490                                       | 0.432739995    |
| 4           | <i>KIT</i>        | rs3733542  | 55297522        | 205051                                       | 0.437741517    |
| 15          | <i>INTERGENIC</i> | rs628501   | 45814620        | 226492                                       | 0.43774746     |
| 4           | <i>KIT</i>        | rs11735550 | 55283476        | 205051                                       | 0.440596804    |
| 13          | <i>RCBTB1</i>     | rs7982555  | 49009511        | 218352                                       | 0.442431382    |
| 5           | <i>SLC12A2</i>    | rs4836369  | 127514361       | 225835                                       | 0.44478868     |
| 12          | <i>KITLG</i>      | rs7953414  | 87481499        | 226534                                       | 0.445003657    |
| 12          | <i>KITLG</i>      | rs4842632  | 87455663        | 226534                                       | 0.446547393    |
| 1           | <i>EIF2C4</i>     | rs2791966  | 36087448        | 227930                                       | 0.446552345    |
| 1           | <i>MASP2</i>      | rs2273344  | 11027709        | 229111                                       | 0.447336887    |
| 4           | <i>KIT</i>        | rs6554200  | 55224166        | 205051                                       | 0.447725621    |
| 4           | <i>HPGD</i>       | rs17360144 | 175659576       | 211548                                       | 0.44829065     |
| 4           | <i>SLIT2</i>      | rs1379659  | 20229781        | 228850                                       | 0.450870478    |
| 2           | <i>PLEKHH2</i>    | rs713262   | 43821026        | 227148                                       | 0.451742387    |
| 19          | <i>HIF3A</i>      | rs11665853 | 51526523        | 1555318                                      | 0.452471721    |
| 7           | <i>RP9</i>        | rs11771864 | 33105400        | 227852                                       | 0.454433246    |
| 6           | <i>PHACTR2</i>    | rs9386046  | 144095189       | 227947                                       | 0.454836733    |
| 8           | <i>WHSC1L1</i>    | rs7837189  | 38266997        | 225318                                       | 0.456039356    |
| 6           | <i>FAM162B</i>    | rs9489034  | 117181912       | 228875                                       | 0.456441644    |
| 8           | <i>RUNX1T1</i>    | rs2294091  | 93036143        | 205528                                       | 0.457094239    |
| 19          | <i>ZNF30</i>      | rs765746   | 40126909        | 232014                                       | 0.457617412    |
| 2           | <i>PLEKHH2</i>    | rs6710907  | 43749203        | 227148                                       | 0.458555842    |
| 2           | <i>PLEKHH2</i>    | rs1560599  | 43799550        | 227148                                       | 0.458853354    |
| 6           | <i>PHACTR2</i>    | rs12214478 | 144092498       | 227947                                       | 0.459243208    |
| 14          | <i>DAAM1</i>      | rs8016509  | 58735496        | 226666                                       | 0.459792295    |
| 5           | <i>SLC12A2</i>    | rs10519973 | 127501029       | 225835                                       | 0.460068589    |
| 12          | <i>KITLG</i>      | rs1907702  | 87479600        | 226534                                       | 0.461255248    |
| 4           | <i>HPGD</i>       | rs1863642  | 175670488       | 211548                                       | 0.463160099    |
| 6           | <i>PHACTR2</i>    | rs6931865  | 144121547       | 227947                                       | 0.463204908    |
| 8           | <i>RUNX1T1</i>    | rs2976501  | 93045739        | 205528                                       | 0.46599068     |

| <i>Chr.</i> | <i>HUGO</i> | <i>SNP</i> | <i>Location</i> | <i>Probe ID from gene expression dataset</i> | <i>P value</i> |
|-------------|-------------|------------|-----------------|----------------------------------------------|----------------|
| 17          | ZNF207      | rs3795244  | 27716509        | 228157                                       | 0.466673657    |
| 19          | HIF3A       | rs2072491  | 51499429        | 1555318                                      | 0.466740558    |
| 21          | CYYR1       | rs219628   | 26787291        | 228665                                       | 0.468086821    |
| 14          | DAAM1       | rs1252909  | 58723047        | 226666                                       | 0.469718676    |
| 13          | TNFRSF19    | rs9507124  | 23106927        | 227812                                       | 0.470528079    |
| 1           | EFCAB7      | rs10889430 | 63766885        | 226800                                       | 0.470903564    |
| 1           | EFCAB7      | rs11805892 | 63785553        | 226800                                       | 0.472492482    |
| 8           | WHSC1L1     | rs10958606 | 38268561        | 225318                                       | 0.472713695    |
| 21          | CYYR1       | rs2830281  | 26851793        | 228665                                       | 0.473628418    |
| 21          | CYYR1       | rs222971   | 26798338        | 228665                                       | 0.473747461    |
| 15          | IREB2       | rs1847529  | 76522125        | 225892                                       | 0.475517181    |
| 13          | TNFRSF19    | rs9510787  | 23103195        | 227812                                       | 0.475851688    |
| 11          | CREBZF      | rs17743826 | 85050819        | 225595                                       | 0.476154453    |
| 6           | HMG3        | rs9343884  | 79978997        | 209377                                       | 0.478183553    |
| 6           | HMG3        | rs10943623 | 79971452        | 209377                                       | 0.478629678    |
| 8           | WHSC1L1     | rs11985168 | 38279200        | 225318                                       | 0.479020133    |
| 6           | PHACTR2     | rs17073061 | 144138559       | 227947                                       | 0.479918       |
| 3           | INTERGENIC  | rs11719903 | 196910459       | 1557293                                      | 0.480830313    |
| 9           | MAK10       | rs954124   | 87752884        | 220925                                       | 0.482596677    |
| 14          | DAAM1       | rs1272669  | 58885535        | 226666                                       | 0.482901039    |
| 6           | HMG3        | rs6912569  | 79965948        | 209377                                       | 0.48462673     |
| 6           | PHACTR2     | rs12524982 | 144050854       | 227947                                       | 0.486891359    |
| 8           | PPAPDC1B    | rs3824289  | 38249590        | 225318                                       | 0.487414845    |
| 12          | KITLG       | rs3782174  | 87463008        | 226534                                       | 0.487527016    |
| 3           | C3ORF50     | rs17744226 | 170010239       | 1558411                                      | 0.487632843    |
| 1           | LEPR        | rs1171276  | 65760037        | 227095                                       | 0.487781007    |
| 11          | SFRS2B      | rs4753652  | 94446370        | 228760                                       | 0.487990768    |
| 6           | QKI         | rs9458846  | 163858321       | 212263                                       | 0.488934146    |
| 4           | KIT         | rs2237025  | 55236636        | 205051                                       | 0.489031551    |
| 18          | POLI        | rs3218786  | 50074207        | 238992                                       | 0.489182303    |
| 7           | RP9         | rs3915352  | 33104997        | 227852                                       | 0.489467562    |
| 2           | PLEKHH2     | rs6544681  | 43719282        | 227148                                       | 0.490438184    |
| 11          | CREBZF      | rs17810766 | 85053249        | 225595                                       | 0.490648003    |
| 1           | ARHGAP29    | rs3789688  | 94463828        | 1558280                                      | 0.490927749    |
| 6           | HMG3        | rs9361503  | 79992718        | 209377                                       | 0.496521334    |
| 1           | LEPR        | rs17127828 | 65868114        | 227095                                       | 0.496790573    |
| 6           | PHACTR2     | rs9376769  | 143970130       | 227947                                       | 0.498187399    |
| 4           | SLIT2       | rs2322560  | 20235195        | 228850                                       | 0.502553216    |
| 4           | KIT         | rs3134889  | 55276825        | 205051                                       | 0.502658031    |
| 19          | ZNF30       | rs2032828  | 40106861        | 232014                                       | 0.504851694    |
| 6           | CCDC90A     | rs6903118  | 13918564        | 220094                                       | 0.505301355    |
| 8           | RUNX1T1     | rs2920468  | 93035671        | 205528                                       | 0.50719732     |
| 21          | CYYR1       | rs219625   | 26786845        | 228665                                       | 0.508033791    |
| 8           | RUNX1T1     | rs2976505  | 93064148        | 205528                                       | 0.509682335    |
| 14          | DAAM1       | rs7149497  | 58847352        | 226666                                       | 0.510084572    |
| 6           | HMG3        | rs11759494 | 79997836        | 209377                                       | 0.510539005    |
| 11          | CREBZF      | rs290171   | 85055344        | 225595                                       | 0.510660318    |
| 10          | ZNF248      | rs1148287  | 38175903        | 213269                                       | 0.511344377    |
| 15          | IREB2       | rs12909921 | 76530315        | 225892                                       | 0.511506589    |
| 5           | SLC12A2     | rs10477682 | 127539219       | 225835                                       | 0.512223481    |
| 6           | HMG3        | rs1060419  | 80001713        | 209377                                       | 0.514478151    |
| 19          | ZNF30       | rs2546019  | 40129107        | 232014                                       | 0.516030675    |
| 2           | PLEKHH2     | rs6544683  | 43732886        | 227148                                       | 0.516033536    |
| 2           | PLEKHH2     | rs7606783  | 43780447        | 227148                                       | 0.517643909    |
| 1           | EFCAB7      | rs3861944  | 63772998        | 226800                                       | 0.51938044     |
| 1           | EFCAB7      | rs9804078  | 63770221        | 226800                                       | 0.519884446    |

| <i>Chr.</i> | <i>HUGO</i> | <i>SNP</i> | <i>Location</i> | <i>Probe ID from gene expression dataset</i> | <i>P value</i> |
|-------------|-------------|------------|-----------------|----------------------------------------------|----------------|
| 1           | LEPR        | rs4655518  | 65812446        | 227095                                       | 0.520077221    |
| 10          | PPP1R3C     | rs1044563  | 93380129        | 204284                                       | 0.522922959    |
| 21          | CYYR1       | rs222972   | 26800448        | 228665                                       | 0.522972733    |
| 4           | KIT         | rs2237017  | 55269911        | 205051                                       | 0.526328055    |
| 1           | EFCAB7      | rs6657480  | 63772456        | 226800                                       | 0.527713187    |
| 1           | LEPR        | rs7535099  | 65823585        | 227095                                       | 0.528241301    |
| 5           | SLC12A2     | rs4835943  | 127485468       | 225835                                       | 0.529831064    |
| 18          | POLI        | rs11660002 | 50081173        | 238992                                       | 0.530145028    |
| 19          | ZNF302      | rs8109787  | 39873271        | 218490                                       | 0.530731393    |
| 1           | MASP2       | rs3819991  | 11027299        | 229111                                       | 0.531483336    |
| 13          | TNFRSF19    | rs7319955  | 23080378        | 227812                                       | 0.532393907    |
| 13          | TNFRSF19    | rs7338164  | 23098266        | 227812                                       | 0.53247058     |
| 6           | HMG3        | rs12202025 | 80001776        | 209377                                       | 0.533460167    |
| 2           | PLEKHH2     | rs17335631 | 43727009        | 227148                                       | 0.533952745    |
| 21          | CYYR1       | rs2830241  | 26767184        | 228665                                       | 0.538879139    |
| 9           | PTCH1       | rs357564   | 97249415        | 209815                                       | 0.540585829    |
| 4           | HPGD        | rs17060596 | 175676840       | 211548                                       | 0.540743404    |
| 6           | PHACTR2     | rs9496739  | 144062593       | 227947                                       | 0.541462166    |
| 8           | RUNX1T1     | rs2920466  | 93067272        | 205528                                       | 0.543383262    |
| 12          | KITLG       | rs10506955 | 87453157        | 226534                                       | 0.544034343    |
| 12          | KITLG       | rs10777127 | 87478426        | 226534                                       | 0.545612066    |
| 19          | ZNF30       | rs10421478 | 40124778        | 232014                                       | 0.547267619    |
| 5           | INTERGENIC  | rs17675580 | 127455979       | 225835                                       | 0.547950772    |
| 14          | DAAM1       | rs1958181  | 58904756        | 226666                                       | 0.549561153    |
| 2           | PLEKHH2     | rs1991739  | 43797029        | 227148                                       | 0.551110634    |
| 6           | HMG3        | rs9343883  | 79966999        | 209377                                       | 0.553641286    |
| 6           | QKI         | rs2294698  | 163915727       | 212263                                       | 0.555892385    |
| 13          | TNFRSF19    | rs3751358  | 23142894        | 227812                                       | 0.558885199    |
| 6           | PHACTR2     | rs960710   | 144102651       | 227947                                       | 0.560083708    |
| 8           | RUNX1T1     | rs2920467  | 93070437        | 205528                                       | 0.560705802    |
| 14          | DAAM1       | rs4901918  | 58887236        | 226666                                       | 0.561621965    |
| 1           | EIF2C4      | rs6674772  | 36090422        | 227930                                       | 0.562761476    |
| 5           | SLC12A2     | rs1993878  | 127504870       | 225835                                       | 0.563092695    |
| 2           | PLEKHH2     | rs755862   | 43756015        | 227148                                       | 0.563651204    |
| 4           | HPGD        | rs1050145  | 175679731       | 211548                                       | 0.564614505    |
| 1           | LEPR        | rs3790429  | 65809364        | 227095                                       | 0.564733999    |
| 6           | HMG3        | rs12661489 | 79998552        | 209377                                       | 0.564755889    |
| 6           | PHACTR2     | rs17072851 | 144011212       | 227947                                       | 0.565048471    |
| 13          | TNFRSF19    | rs6490812  | 23101027        | 227812                                       | 0.56582695     |
| 2           | PLEKHH2     | rs6713194  | 43792062        | 227148                                       | 0.566152235    |
| 14          | DAAM1       | rs1253035  | 58895625        | 226666                                       | 0.570806505    |
| 17          | CROP        | rs1055371  | 46171261        | 208835                                       | 0.572282997    |
| 4           | HPGD        | rs1346271  | 175680581       | 211548                                       | 0.573781458    |
| 1           | MASP2       | rs12143364 | 11033740        | 229111                                       | 0.574813682    |
| 6           | PHACTR2     | rs7757372  | 143972097       | 227947                                       | 0.575049277    |
| 13          | TNFRSF19    | rs7332106  | 23073420        | 227812                                       | 0.578133465    |
| 10          | PPP1R3C     | rs10509633 | 93385768        | 204284                                       | 0.578219746    |
| 6           | QKI         | rs3756879  | 163910298       | 212263                                       | 0.579344084    |
| 19          | ZNF302      | rs2290652  | 39867048        | 218490                                       | 0.57984682     |
| 1           | LEPR        | rs7413823  | 65796304        | 227095                                       | 0.580844572    |
| 1           | LEPR        | rs1171267  | 65776442        | 227095                                       | 0.581987418    |
| 6           | PHACTR2     | rs2474152  | 144054752       | 227947                                       | 0.582547493    |
| 19          | CIRBP       | rs11555031 | 1221981         | 230142                                       | 0.583052552    |
| 12          | KITLG       | rs7135958  | 87457875        | 226534                                       | 0.585473696    |
| 1           | LEPR        | rs3790424  | 65816601        | 227095                                       | 0.585646372    |
| 6           | PHACTR2     | rs3818113  | 144116362       | 227947                                       | 0.585690159    |



| <i>Chr.</i> | <i>HUGO</i>       | <i>SNP</i> | <i>Location</i> | <i>Probe ID from gene expression dataset</i> | <i>P value</i> |
|-------------|-------------------|------------|-----------------|----------------------------------------------|----------------|
| 6           | <i>HMGN3</i>      | rs2236543  | 79968908        | 209377                                       | 0.586819827    |
| 13          | <i>TNFRSF19</i>   | rs9553020  | 23100405        | 227812                                       | 0.588067724    |
| 12          | <i>KITLG</i>      | rs1388789  | 87412346        | 226534                                       | 0.590043554    |
| 6           | <i>PHACTR2</i>    | rs1546947  | 144145254       | 227947                                       | 0.595386967    |
| 14          | <i>DAAM1</i>      | rs8016570  | 58735687        | 226666                                       | 0.596153288    |
| 13          | <i>TNFRSF19</i>   | rs1928114  | 23077705        | 227812                                       | 0.596822394    |
| 19          | <i>ZNF44</i>      | rs2438558  | 12214830        | 215359                                       | 0.597308716    |
| 14          | <i>SLC25A29</i>   | rs1059264  | 99838916        | 224711                                       | 0.59832654     |
| 13          | <i>PHF11</i>      | rs2981     | 48999095        | 218352                                       | 0.601055062    |
| 1           | <i>MASP2</i>      | rs3765900  | 11026957        | 229111                                       | 0.601406779    |
| 12          | <i>KITLG</i>      | rs11104952 | 87480531        | 226534                                       | 0.604501148    |
| 21          | <i>CYYR1</i>      | rs2830279  | 26846849        | 228665                                       | 0.604847489    |
| 6           | <i>FAM162B</i>    | rs11153626 | 117178262       | 228875                                       | 0.605574104    |
| 8           | <i>RUNX1T1</i>    | rs7845969  | 93091263        | 205528                                       | 0.606783852    |
| 8           | <i>RUNX1T1</i>    | rs1814032  | 93074623        | 205528                                       | 0.609439196    |
| 12          | <i>KITLG</i>      | rs1162372  | 87428062        | 226534                                       | 0.609455255    |
| 2           | <i>PLEKHH2</i>    | rs17414174 | 43791004        | 227148                                       | 0.610227269    |
| 10          | <i>ZNF248</i>     | rs2295872  | 38186224        | 213269                                       | 0.61073307     |
| 8           | <i>RUNX1T1</i>    | rs1443558  | 93055561        | 205528                                       | 0.611201677    |
| 15          | <i>IREB2</i>      | rs10519198 | 76529809        | 225892                                       | 0.612486892    |
| 14          | <i>DAAM1</i>      | rs2757117  | 58764396        | 226666                                       | 0.613484343    |
| 1           | <i>ARHGAP29</i>   | rs3789693  | 94413476        | 1558280                                      | 0.614491809    |
| 6           | <i>CCDC90A</i>    | rs3734669  | 13898281        | 220094                                       | 0.614641631    |
| 1           | <i>EFCAB7</i>     | rs2273367  | 63793684        | 226800                                       | 0.615981548    |
| 6           | <i>PHACTR2</i>    | rs6570581  | 144142558       | 227947                                       | 0.616336073    |
| 10          | <i>PPP1R3C</i>    | rs2242121  | 93382960        | 204284                                       | 0.617344354    |
| 6           | <i>QKI</i>        | rs6931903  | 163830315       | 212263                                       | 0.61751371     |
| 9           | <i>MAK10</i>      | rs4877956  | 87797808        | 220925                                       | 0.619431233    |
| 19          | <i>ZNF302</i>     | rs10418293 | 39873668        | 218490                                       | 0.620989112    |
| 13          | <i>TNFRSF19</i>   | rs4770469  | 23094178        | 227812                                       | 0.62161633     |
| 15          | <i>INTERGENIC</i> | rs1439319  | 45796262        | 226492                                       | 0.623666229    |
| 21          | <i>CYYR1</i>      | rs2830244  | 26769135        | 228665                                       | 0.625041227    |
| 14          | <i>DAAM1</i>      | rs11844752 | 58728478        | 226666                                       | 0.625899249    |
| 6           | <i>PHACTR2</i>    | rs1082     | 144187490       | 227947                                       | 0.625914603    |
| 8           | <i>RUNX1T1</i>    | rs7004147  | 93093581        | 205528                                       | 0.626779285    |
| 19          | <i>ZNF44</i>      | rs1047138  | 12216506        | 215359                                       | 0.628749016    |
| 2           | <i>PLEKHH2</i>    | rs10211617 | 43777675        | 227148                                       | 0.629064351    |
| 12          | <i>KITLG</i>      | rs2407205  | 87467727        | 226534                                       | 0.629167156    |
| 6           | <i>PHACTR2</i>    | rs9403527  | 144089526       | 227947                                       | 0.629259348    |
| 8           | <i>RUNX1T1</i>    | rs2920462  | 93054684        | 205528                                       | 0.630320351    |
| 12          | <i>ZNF84</i>      | rs623100   | 132144523       | 228630                                       | 0.633148197    |
| 12          | <i>KITLG</i>      | rs7313352  | 87473255        | 226534                                       | 0.634315677    |
| 8           | <i>RUNX1T1</i>    | rs2920471  | 93051050        | 205528                                       | 0.63434421     |
| 2           | <i>PLEKHH2</i>    | rs4952997  | 43776180        | 227148                                       | 0.635518894    |
| 6           | <i>PHACTR2</i>    | rs6570569  | 143981332       | 227947                                       | 0.635560439    |
| 21          | <i>CYYR1</i>      | rs222950   | 26835579        | 228665                                       | 0.635684997    |
| 4           | <i>HPGD</i>       | rs3846298  | 175665788       | 211548                                       | 0.635993533    |
| 10          | <i>PPP1R3C</i>    | rs11186638 | 93386994        | 204284                                       | 0.637292698    |
| 14          | <i>DAAM1</i>      | rs1252989  | 58748939        | 226666                                       | 0.63924107     |
| 14          | <i>DAAM1</i>      | rs1253005  | 58800998        | 226666                                       | 0.641423045    |
| 18          | <i>POLI</i>       | rs8305     | 50074803        | 238992                                       | 0.641573825    |
| 12          | <i>KITLG</i>      | rs10858758 | 87468649        | 226534                                       | 0.641990028    |
| 6           | <i>FLJ38717</i>   | rs2894478  | 42861382        | 1559964                                      | 0.643270365    |
| 21          | <i>CYYR1</i>      | rs2830253  | 26777248        | 228665                                       | 0.643307596    |
| 19          | <i>ZNF302</i>     | rs2100609  | 39872607        | 218490                                       | 0.643458884    |
| 12          | <i>KITLG</i>      | rs2291557  | 87434438        | 226534                                       | 0.643997256    |

| <i>Chr.</i> | <i>HUGO</i>     | <i>SNP</i> | <i>Location</i> | <i>Probe ID from gene expression dataset</i> | <i>P value</i> |
|-------------|-----------------|------------|-----------------|----------------------------------------------|----------------|
| 8           | <i>RUNX1T1</i>  | rs7827887  | 93095550        | 205528                                       | 0.646584354    |
| 1           | <i>LEPR</i>     | rs6661050  | 65845484        | 227095                                       | 0.647460697    |
| 1           | <i>LEPR</i>     | rs1171281  | 65762699        | 227095                                       | 0.647644613    |
| 15          | <i>SEMA6D</i>   | rs10519143 | 45842859        | 226492                                       | 0.647967398    |
| 12          | <i>KITLG</i>    | rs11104907 | 87417390        | 226534                                       | 0.648618013    |
| 3           | <i>C3ORF50</i>  | rs603638   | 170021687       | 1558411                                      | 0.650045211    |
| 13          | <i>TNFRSF19</i> | rs12429321 | 23108575        | 227812                                       | 0.651685075    |
| 12          | <i>KITLG</i>    | rs1472898  | 87475764        | 226534                                       | 0.65173284     |
| 6           | <i>CCDC90A</i>  | rs9370483  | 13926710        | 220094                                       | 0.652068444    |
| 12          | <i>KITLG</i>    | rs1907699  | 87414108        | 226534                                       | 0.652347026    |
| 11          | <i>CREBZF</i>   | rs1192     | 85052641        | 225595                                       | 0.654241686    |
| 4           | <i>KIT</i>      | rs759083   | 55232238        | 205051                                       | 0.654501569    |
| 19          | <i>ZNF302</i>   | rs10401309 | 39867589        | 218490                                       | 0.655115486    |
| 1           | <i>EFCAB7</i>   | rs12124096 | 63759045        | 226800                                       | 0.65547637     |
| 14          | <i>DAAM1</i>    | rs12878070 | 58889427        | 226666                                       | 0.658239999    |
| 12          | <i>KITLG</i>    | rs1000788  | 87470908        | 226534                                       | 0.658444306    |
| 13          | <i>TNFRSF19</i> | rs3794360  | 23060001        | 227812                                       | 0.659201658    |
| 13          | <i>RBM26</i>    | rs9545061  | 78782831        | 226316                                       | 0.65933372     |
| 1           | <i>LEPR</i>     | rs12038998 | 65821716        | 227095                                       | 0.660337213    |
| 12          | <i>KITLG</i>    | rs1061981  | 87411420        | 226534                                       | 0.660883716    |
| 6           | <i>PHACTR2</i>  | rs9496751  | 144075685       | 227947                                       | 0.661544729    |
| 4           | <i>KIT</i>      | rs2213180  | 55296084        | 205051                                       | 0.663844631    |
| 13          | <i>RBM26</i>    | rs1980883  | 78782765        | 226316                                       | 0.666119425    |
| 8           | <i>RUNX1T1</i>  | rs7830403  | 93078028        | 205528                                       | 0.666674632    |
| 4           | <i>KIT</i>      | rs3134884  | 55261023        | 205051                                       | 0.666974455    |
| 6           | <i>PHACTR2</i>  | rs7742964  | 144147096       | 227947                                       | 0.667003277    |
| 6           | <i>FAM162B</i>  | rs633420   | 117188839       | 228875                                       | 0.669187999    |
| 11          | <i>SFRS2B</i>   | rs1447388  | 94437811        | 228760                                       | 0.669786831    |
| 8           | <i>RUNX1T1</i>  | rs2976502  | 93049910        | 205528                                       | 0.669977035    |
| 6           | <i>PHACTR2</i>  | rs2328516  | 144157729       | 227947                                       | 0.670266976    |
| 4           | <i>KIT</i>      | rs2159935  | 55215774        | 205051                                       | 0.670403743    |
| 2           | <i>PLEKHH2</i>  | rs7602498  | 43844007        | 227148                                       | 0.670953687    |
| 14          | <i>DAAM1</i>    | rs1253010  | 58796192        | 226666                                       | 0.671131369    |
| 8           | <i>RUNX1T1</i>  | rs2083844  | 93083325        | 205528                                       | 0.67227569     |
| 2           | <i>PLEKHH2</i>  | rs4953002  | 43784680        | 227148                                       | 0.672357773    |
| 13          | <i>RCBTB1</i>   | rs12146924 | 49032359        | 218352                                       | 0.672545497    |
| 2           | <i>PLEKHH2</i>  | rs6741367  | 43724779        | 227148                                       | 0.67304863     |
| 3           | <i>C3ORF50</i>  | rs3732460  | 170013264       | 1558411                                      | 0.673052245    |
| 13          | <i>RBM26</i>    | rs1408656  | 78784655        | 226316                                       | 0.673274699    |
| 3           | <i>C3ORF50</i>  | rs2671260  | 170018257       | 1558411                                      | 0.673524833    |
| 17          | <i>ZNF207</i>   | rs8068787  | 27725992        | 228157                                       | 0.673735394    |
| 1           | <i>ARHGAP29</i> | rs1411700  | 94407551        | 1558280                                      | 0.674528185    |
| 10          | <i>PPP1R3C</i>  | rs12261209 | 93379323        | 204284                                       | 0.674727885    |
| 12          | <i>KITLG</i>    | rs7969188  | 87448198        | 226534                                       | 0.675165072    |
| 7           | <i>RP9</i>      | rs9692506  | 33119281        | 227852                                       | 0.678585785    |
| 1           | <i>ARHGAP29</i> | rs12044374 | 94408574        | 1558280                                      | 0.678876533    |
| 12          | <i>KITLG</i>    | rs906639   | 87415584        | 226534                                       | 0.682842862    |
| 2           | <i>PLEKHH2</i>  | rs1368087  | 43818341        | 227148                                       | 0.683942161    |
| 7           | <i>RP9</i>      | rs9690597  | 33119590        | 227852                                       | 0.684904575    |
| 13          | <i>TNFRSF19</i> | rs17079176 | 23150985        | 227812                                       | 0.689735104    |
| 6           | <i>PHACTR2</i>  | rs9484785  | 144001451       | 227947                                       | 0.690789486    |
| 13          | <i>TNFRSF19</i> | rs1928120  | 23065838        | 227812                                       | 0.691339214    |
| 12          | <i>KITLG</i>    | rs1492347  | 87450104        | 226534                                       | 0.691608819    |
| 2           | <i>PLEKHH2</i>  | rs11695642 | 43806199        | 227148                                       | 0.693163342    |
| 11          | <i>SFRS2B</i>   | rs663629   | 94444156        | 228760                                       | 0.693800693    |
| 13          | <i>TNFRSF19</i> | rs9510795  | 23114012        | 227812                                       | 0.693813597    |

| <i>Chr.</i> | <i>HUGO</i> | <i>SNP</i> | <i>Location</i> | <i>Probe ID from gene expression dataset</i> | <i>P value</i> |
|-------------|-------------|------------|-----------------|----------------------------------------------|----------------|
| 10          | ZNF248      | rs9417268  | 38173200        | 213269                                       | 0.693818075    |
| 12          | KITLG       | rs11104903 | 87407546        | 226534                                       | 0.694339072    |
| 7           | RSBN1L      | rs11970824 | 77245492        | 228963                                       | 0.694907427    |
| 13          | TNFRSF19    | rs17419586 | 23148712        | 227812                                       | 0.696294627    |
| 12          | RECQL       | rs10841832 | 21519603        | 213878                                       | 0.69644679     |
| 5           | SLC12A2     | rs4835941  | 127458804       | 225835                                       | 0.697806887    |
| 5           | SLC12A2     | rs10463838 | 127546204       | 225835                                       | 0.698296959    |
| 2           | PLEKHH2     | rs2374569  | 43738561        | 227148                                       | 0.699387705    |
| 13          | RBM26       | rs1410332  | 78787307        | 226316                                       | 0.700261397    |
| 6           | QKI         | rs6902608  | 163797747       | 212263                                       | 0.701228813    |
| 13          | RBM26       | rs1927506  | 78783486        | 226316                                       | 0.701976938    |
| 21          | CYYR1       | rs2830249  | 26772842        | 228665                                       | 0.703584007    |
| 13          | TNFRSF19    | rs4770467  | 23081145        | 227812                                       | 0.703594321    |
| 13          | RBM26       | rs3818563  | 78790723        | 226316                                       | 0.706102158    |
| 1           | LEPR        | rs3790431  | 65808616        | 227095                                       | 0.706598878    |
| 12          | ZNF84       | rs2230099  | 132143971       | 228630                                       | 0.706869728    |
| 13          | TNFRSF19    | rs9507136  | 23127353        | 227812                                       | 0.707455417    |
| 15          | IREB2       | rs17405883 | 76549446        | 225892                                       | 0.707593222    |
| 13          | TNFRSF19    | rs3751364  | 23132517        | 227812                                       | 0.709167338    |
| 19          | C19ORF24    | rs757292   | 1228275         | 230142                                       | 0.709883987    |
| 14          | DAAM1       | rs1253008  | 58798133        | 226666                                       | 0.710666654    |
| 13          | TNFRSF19    | rs8001054  | 23138331        | 227812                                       | 0.712238663    |
| 14          | DAAM1       | rs1253012  | 58792467        | 226666                                       | 0.712845935    |
| 8           | RUNX1T1     | rs6987763  | 93097694        | 205528                                       | 0.713434612    |
| 21          | CYYR1       | rs369515   | 26812202        | 228665                                       | 0.715781509    |
| 13          | TNFRSF19    | rs7400079  | 23118816        | 227812                                       | 0.71672031     |
| 2           | PLEKHH2     | rs12473033 | 43716392        | 227148                                       | 0.720136027    |
| 2           | ORC2L       | rs4381763  | 201485233       | 235423                                       | 0.720455186    |
| 4           | SLIT2       | rs11930632 | 20233074        | 228850                                       | 0.720952083    |
| 19          | ZNF44       | rs776291   | 12269593        | 215359                                       | 0.722670402    |
| 6           | CCDC90A     | rs3180196  | 13909594        | 220094                                       | 0.723586664    |
| 1           | EFCAB7      | rs10889427 | 63763306        | 226800                                       | 0.726174259    |
| 17          | CROP        | rs9911873  | 46163464        | 208835                                       | 0.726529846    |
| 1           | LEPR        | rs4655537  | 65831389        | 227095                                       | 0.727246054    |
| 12          | AMIGO2      | rs854892   | 45763954        | 222108                                       | 0.727464993    |
| 2           | PLEKHH2     | rs17031309 | 43782914        | 227148                                       | 0.729890276    |
| 12          | KITLG       | rs10506953 | 87424377        | 226534                                       | 0.730651583    |
| 14          | DAAM1       | rs10083442 | 58900633        | 226666                                       | 0.73286435     |
| 13          | RCBTB1      | rs4942848  | 49039346        | 218352                                       | 0.733142771    |
| 13          | PHF11       | rs9535255  | 49002387        | 218352                                       | 0.733454694    |
| 19          | HIF3A       | rs3810300  | 51492037        | 1555318                                      | 0.734209213    |
| 21          | CYYR1       | rs979343   | 26797463        | 228665                                       | 0.73499224     |
| 4           | KIT         | rs13119906 | 55214529        | 205051                                       | 0.735516493    |
| 12          | KITLG       | rs11104906 | 87415907        | 226534                                       | 0.736085751    |
| 4           | KIT         | rs4864920  | 55285378        | 205051                                       | 0.737266737    |
| 5           | SLC12A2     | rs10478798 | 127470293       | 225835                                       | 0.737718957    |
| 4           | KIT         | rs11946333 | 55248558        | 205051                                       | 0.741691895    |
| 15          | SEMA6D      | rs3743281  | 45844250        | 226492                                       | 0.741722718    |
| 8           | RUNX1T1     | rs2976506  | 93068050        | 205528                                       | 0.742928724    |
| 14          | DAAM1       | rs1536619  | 58883114        | 226666                                       | 0.74380088     |
| 19          | ZNF30       | rs1053213  | 40127616        | 232014                                       | 0.745837639    |
| 12          | KITLG       | rs995029   | 87414652        | 226534                                       | 0.752896597    |
| 6           | QKI         | rs11964059 | 163895813       | 212263                                       | 0.753380998    |
| 1           | LEPR        | rs3790419  | 65839697        | 227095                                       | 0.754195345    |
| 1           | ARHGAP29    | rs1048854  | 94416119        | 1558280                                      | 0.754201038    |
| 1           | LEPR        | rs3790428  | 65814666        | 227095                                       | 0.75468231     |

| <i>Chr.</i> | <i>HUGO</i> | <i>SNP</i> | <i>Location</i> | <i>Probe ID from gene expression dataset</i> | <i>P value</i> |
|-------------|-------------|------------|-----------------|----------------------------------------------|----------------|
| 21          | CYYR1       | rs2830254  | 26781725        | 228665                                       | 0.754775522    |
| 5           | SLC12A2     | rs3805616  | 127548796       | 225835                                       | 0.755163213    |
| 13          | TNFRSF19    | rs9550987  | 23065505        | 227812                                       | 0.757060655    |
| 13          | TNFRSF19    | rs11616958 | 23071049        | 227812                                       | 0.757334143    |
| 1           | ARHGAP29    | rs6657063  | 94431982        | 1558280                                      | 0.757755165    |
| 12          | KITLG       | rs11104923 | 87445248        | 226534                                       | 0.758186093    |
| 10          | PPP1R3C     | rs4933680  | 93385216        | 204284                                       | 0.758930276    |
| 13          | PHF11       | rs3794378  | 49001218        | 218352                                       | 0.759729107    |
| 13          | TNFRSF19    | rs9507128  | 23115092        | 227812                                       | 0.764418999    |
| 6           | PHACTR2     | rs12661297 | 144129002       | 227947                                       | 0.764693774    |
| 6           | PHACTR2     | rs9373395  | 143981805       | 227947                                       | 0.765059009    |
| 6           | PHACTR2     | rs7740883  | 144064081       | 227947                                       | 0.766398666    |
| 11          | CREBZF      | rs471226   | 85055685        | 225595                                       | 0.766987542    |
| 2           | PLEKHH2     | rs989381   | 43770242        | 227148                                       | 0.768603795    |
| 19          | ZNF44       | rs2458997  | 12240079        | 215359                                       | 0.771257917    |
| 13          | TNFRSF19    | rs1928113  | 23078190        | 227812                                       | 0.771268468    |
| 21          | CYYR1       | rs222966   | 26851729        | 228665                                       | 0.772589956    |
| 21          | CYYR1       | rs2830237  | 26758024        | 228665                                       | 0.773743571    |
| 5           | SLC12A2     | rs3805604  | 127496699       | 225835                                       | 0.776033492    |
| 21          | CYYR1       | rs2830247  | 26770869        | 228665                                       | 0.776372169    |
| 13          | TNFRSF19    | rs9510777  | 23042278        | 227812                                       | 0.776713174    |
| 1           | LEPR        | rs8179183  | 65848540        | 227095                                       | 0.776922994    |
| 13          | TNFRSF19    | rs9550986  | 23064932        | 227812                                       | 0.777485248    |
| 5           | SLC12A2     | rs806100   | 127496076       | 225835                                       | 0.778903935    |
| 6           | PHACTR2     | rs9386043  | 144066351       | 227947                                       | 0.779334111    |
| 9           | MAK10       | rs10868362 | 87824482        | 220925                                       | 0.779678014    |
| 21          | CYYR1       | rs2830242  | 26767406        | 228665                                       | 0.779837854    |
| 1           | ARHGAP29    | rs3814019  | 94476984        | 1558280                                      | 0.779921409    |
| 1           | LEPR        | rs3790437  | 65858021        | 227095                                       | 0.780328934    |
| 12          | ATP6V0A2    | rs2333834  | 122811957       | 229572                                       | 0.783017189    |
| 13          | RCBTB1      | rs12430435 | 49040501        | 218352                                       | 0.783058815    |
| 4           | SLIT2       | rs17544415 | 20235752        | 228850                                       | 0.783722472    |
| 21          | CYYR1       | rs222934   | 26820863        | 228665                                       | 0.785184253    |
| 6           | CCDC90A     | rs3734672  | 13895557        | 220094                                       | 0.785930485    |
| 12          | ATP6V0A2    | rs7976110  | 122815771       | 229572                                       | 0.786588701    |
| 15          | GOLGA8A     | rs7727     | 32458730        | 213650                                       | 0.788947822    |
| 4           | HPGD        | rs2612656  | 175658864       | 211548                                       | 0.789449339    |
| 8           | RUNX1T1     | rs2920464  | 93056929        | 205528                                       | 0.789740353    |
| 6           | PHACTR2     | rs3734226  | 144192524       | 227947                                       | 0.79393325     |
| 8           | RUNX1T1     | rs2977677  | 93036748        | 205528                                       | 0.794158489    |
| 10          | PPP1R3C     | rs10881935 | 93387681        | 204284                                       | 0.794619881    |
| 12          | KITLG       | rs3907470  | 87482481        | 226534                                       | 0.795334341    |
| 4           | KIT         | rs3819389  | 55221677        | 205051                                       | 0.795735403    |
| 6           | PHACTR2     | rs761626   | 144167380       | 227947                                       | 0.798762043    |
| 4           | KIT         | rs17084644 | 55260202        | 205051                                       | 0.79889444     |
| 21          | CYYR1       | rs966410   | 26774595        | 228665                                       | 0.799292569    |
| 12          | KITLG       | rs11104911 | 87428895        | 226534                                       | 0.800308025    |
| 13          | PHF11       | rs9568239  | 49003056        | 218352                                       | 0.800757978    |
| 6           | PHACTR2     | rs4896668  | 144069846       | 227947                                       | 0.800874143    |
| 13          | TNFRSF19    | rs9507130  | 23117960        | 227812                                       | 0.802933975    |
| 6           | PHACTR2     | rs12524707 | 143995365       | 227947                                       | 0.806249856    |
| 9           | MAK10       | rs10868357 | 87787082        | 220925                                       | 0.807918689    |
| 13          | RCBTB1      | rs12429331 | 49040230        | 218352                                       | 0.810080973    |
| 19          | HIF3A       | rs3764609  | 51515542        | 1555318                                      | 0.810240941    |
| 1           | ARHGAP29    | rs1541098  | 94440558        | 1558280                                      | 0.812729374    |
| 21          | CYYR1       | rs219643   | 26762438        | 228665                                       | 0.81536619     |

| <i>Chr.</i> | <i>HUGO</i> | <i>SNP</i> | <i>Location</i> | <i>Probe ID from gene expression dataset</i> | <i>P value</i> |
|-------------|-------------|------------|-----------------|----------------------------------------------|----------------|
| 21          | CYYR1       | rs2830274  | 26831574        | 228665                                       | 0.817137794    |
| 12          | KITLG       | rs2407206  | 87467454        | 226534                                       | 0.817615117    |
| 11          | CREBZF      | rs3824956  | 85048130        | 225595                                       | 0.819104636    |
| 21          | CYYR1       | rs222970   | 26861474        | 228665                                       | 0.819709956    |
| 5           | SLC12A2     | rs3805603  | 127479480       | 225835                                       | 0.820699722    |
| 4           | HPGD        | rs2555629  | 175666863       | 211548                                       | 0.822378763    |
| 3           | FOXP1       | rs6808430  | 71710847        | 238712                                       | 0.823292425    |
| 1           | LEPR        | rs1137101  | 65831101        | 227095                                       | 0.824268841    |
| 21          | CYYR1       | rs150754   | 26767528        | 228665                                       | 0.825050886    |
| 19          | ZNF44       | rs2459040  | 12246749        | 215359                                       | 0.825615072    |
| 10          | PPP1R3C     | rs3781228  | 93380660        | 204284                                       | 0.827052803    |
| 7           | RP9         | rs10281493 | 33119787        | 227852                                       | 0.831895345    |
| 7           | RP9         | rs9692508  | 33119193        | 227852                                       | 0.831977956    |
| 4           | KIT         | rs2237023  | 55252741        | 205051                                       | 0.832377968    |
| 10          | ZNF248      | rs11011379 | 38161637        | 213269                                       | 0.833909847    |
| 21          | CYYR1       | rs219648   | 26767987        | 228665                                       | 0.834022545    |
| 15          | SEMA6D      | rs1045688  | 45852779        | 226492                                       | 0.834811498    |
| 10          | INTERGENIC  | rs2488087  | 94436021        | 215933                                       | 0.834850595    |
| 7           | RSBN1L      | rs6954671  | 77248250        | 228963                                       | 0.837278253    |
| 1           | LEPR        | rs1137100  | 65809029        | 227095                                       | 0.838420622    |
| 4           | HPGD        | rs3775977  | 175666383       | 211548                                       | 0.840188676    |
| 1           | ARHGAP29    | rs2274788  | 94447314        | 1558280                                      | 0.840455371    |
| 19          | ZNF44       | rs2438531  | 12245988        | 215359                                       | 0.842007275    |
| 13          | PHF11       | rs9526569  | 49000220        | 218352                                       | 0.842243917    |
| 14          | DAAM1       | rs1438521  | 58723553        | 226666                                       | 0.84351352     |
| 19          | ZNF44       | rs2943690  | 12239371        | 215359                                       | 0.844825434    |
| 21          | CYYR1       | rs952830   | 26834573        | 228665                                       | 0.849783337    |
| 19          | ZNF44       | rs386901   | 12266552        | 215359                                       | 0.850759806    |
| 1           | LEPR        | rs3790423  | 65837577        | 227095                                       | 0.85093875     |
| 21          | CYYR1       | rs951810   | 26804130        | 228665                                       | 0.853213126    |
| 6           | PHACTR2     | rs7741506  | 143993560       | 227947                                       | 0.854403065    |
| 21          | CYYR1       | rs222979   | 26866502        | 228665                                       | 0.855276519    |
| 4           | KIT         | rs2282779  | 55228340        | 205051                                       | 0.859398661    |
| 19          | ZNF44       | rs438963   | 12265576        | 215359                                       | 0.859483815    |
| 21          | CYYR1       | rs2830245  | 26769202        | 228665                                       | 0.859635062    |
| 2           | PLEKHH2     | rs17031368 | 43826603        | 227148                                       | 0.859797888    |
| 9           | PTCH1       | rs2066836  | 97278179        | 209815                                       | 0.860353629    |
| 1           | LEPR        | rs10889567 | 65829638        | 227095                                       | 0.861291537    |
| 13          | TNFRSF19    | rs2149499  | 23059499        | 227812                                       | 0.863251033    |
| 6           | QKI         | rs9347755  | 163852573       | 212263                                       | 0.863565275    |
| 14          | DAAM1       | rs9323341  | 58746921        | 226666                                       | 0.863920583    |
| 13          | TNFRSF19    | rs9550985  | 23055969        | 227812                                       | 0.864717051    |
| 13          | RCBTB1      | rs11148151 | 49042614        | 218352                                       | 0.864725208    |
| 4           | KIT         | rs2855772  | 55243232        | 205051                                       | 0.867203731    |
| 6           | HMGN3       | rs9361502  | 79987750        | 209377                                       | 0.867332071    |
| 4           | KIT         | rs2213181  | 55299629        | 205051                                       | 0.867575203    |
| 19          | ZNF44       | rs2438589  | 12256022        | 215359                                       | 0.868022959    |
| 13          | RCBTB1      | rs7995684  | 49004956        | 218352                                       | 0.870275225    |
| 6           | PHACTR2     | rs9376784  | 144089773       | 227947                                       | 0.871372706    |
| 1           | ARHGAP29    | rs1929132  | 94464727        | 1558280                                      | 0.873354456    |
| 9           | MAK10       | rs13296057 | 87757580        | 220925                                       | 0.878034138    |
| 2           | PLEKHH2     | rs12466404 | 43714152        | 227148                                       | 0.878474841    |
| 21          | CYYR1       | rs190100   | 26756022        | 228665                                       | 0.878629249    |
| 9           | MAK10       | rs4242636  | 87783798        | 220925                                       | 0.878867035    |
| 6           | QKI         | rs6926584  | 163895448       | 212263                                       | 0.883752202    |
| 8           | WHSC1L1     | rs13264830 | 38260330        | 225318                                       | 0.884180685    |

| <i>Chr.</i> | <i>HUGO</i> | <i>SNP</i> | <i>Location</i> | <i>Probe ID from gene expression dataset</i> | <i>P value</i> |
|-------------|-------------|------------|-----------------|----------------------------------------------|----------------|
| 21          | CYYR1       | rs2830256  | 26788785        | 228665                                       | 0.885834789    |
| 1           | LEPR        | rs6673324  | 65803651        | 227095                                       | 0.886258934    |
| 9           | MAK10       | rs11141165 | 87774834        | 220925                                       | 0.888497924    |
| 21          | CYYR1       | rs2830246  | 26769774        | 228665                                       | 0.889349683    |
| 6           | PHACTR2     | rs9403533  | 144168862       | 227947                                       | 0.889779675    |
| 1           | LEPR        | rs4655539  | 65832251        | 227095                                       | 0.891616365    |
| 13          | TNFRSF19    | rs7337765  | 23041913        | 227812                                       | 0.892902909    |
| 9           | MAK10       | rs4877955  | 87795025        | 220925                                       | 0.893256883    |
| 19          | ZNF44       | rs1399699  | 12234005        | 215359                                       | 0.893851627    |
| 1           | LEPR        | rs1185692  | 65773247        | 227095                                       | 0.894183436    |
| 4           | KIT         | rs2237028  | 55231132        | 205051                                       | 0.894399853    |
| 2           | PLEKHH2     | rs17414390 | 43829767        | 227148                                       | 0.89444245     |
| 1           | LEPR        | rs3828037  | 65826385        | 227095                                       | 0.895355675    |
| 13          | TNFRSF19    | rs3794359  | 23061217        | 227812                                       | 0.898670998    |
| 6           | PHACTR2     | rs6931825  | 144121481       | 227947                                       | 0.900407295    |
| 4           | KIT         | rs1008658  | 55294193        | 205051                                       | 0.902505477    |
| 6           | CCDC90A     | rs4715568  | 13902089        | 220094                                       | 0.906571675    |
| 13          | TNFRSF19    | rs7999155  | 23053915        | 227812                                       | 0.909822545    |
| 6           | PHACTR2     | rs2328521  | 144184351       | 227947                                       | 0.910333888    |
| 10          | ZNF248      | rs1148292  | 38184264        | 213269                                       | 0.910533529    |
| 4           | KIT         | rs3822213  | 55219490        | 205051                                       | 0.910759867    |
| 2           | PLEKHH2     | rs2278358  | 43821671        | 227148                                       | 0.911236518    |
| 12          | KITLG       | rs10506954 | 87448883        | 226534                                       | 0.9119477      |
| 14          | DAAM1       | rs11623633 | 58881418        | 226666                                       | 0.914374695    |
| 11          | SFRS2B      | rs1056986  | 94441966        | 228760                                       | 0.914922357    |
| 1           | EIF2C4      | rs12089251 | 36051643        | 227930                                       | 0.915253353    |
| 3           | TIGIT       | rs4682535  | 115520372       | 213156                                       | 0.915705639    |
| 1           | SYDE2       | rs12036276 | 85395874        | 239847                                       | 0.919023786    |
| 2           | PLEKHH2     | rs2888881  | 43792583        | 227148                                       | 0.919336877    |
| 14          | DAAM1       | rs941886   | 58884255        | 226666                                       | 0.920849414    |
| 1           | LEPR        | rs3762273  | 65836881        | 227095                                       | 0.921765696    |
| 1           | LEPR        | rs1782763  | 65780488        | 227095                                       | 0.923339489    |
| 4           | HPGD        | rs3797013  | 175670969       | 211548                                       | 0.923549546    |
| 6           | PHACTR2     | rs9386049  | 144171782       | 227947                                       | 0.924576355    |
| 14          | DAAM1       | rs9323342  | 58750702        | 226666                                       | 0.925801938    |
| 1           | LEPR        | rs10889569 | 65858782        | 227095                                       | 0.926042636    |
| 6           | HMGN3       | rs4706085  | 79991150        | 209377                                       | 0.926814919    |
| 17          | CROP        | rs12150475 | 46173900        | 208835                                       | 0.927300399    |
| 13          | PHF11       | rs3829366  | 49001412        | 218352                                       | 0.928334805    |
| 9           | PTCH1       | rs473902   | 97296056        | 209815                                       | 0.92894494     |
| 4           | HPGD        | rs7434504  | 175673692       | 211548                                       | 0.930333104    |
| 11          | CREBZF      | rs1214001  | 85057159        | 225595                                       | 0.93089657     |
| 6           | QKI         | rs2784865  | 163753525       | 212263                                       | 0.93222585     |
| 14          | DAAM1       | rs2146010  | 58866540        | 226666                                       | 0.932303218    |
| 4           | KIT         | rs13135792 | 55247087        | 205051                                       | 0.93616815     |
| 5           | SLC12A2     | rs2617615  | 127492000       | 225835                                       | 0.937141836    |
| 2           | PLEKHH2     | rs12623703 | 43780963        | 227148                                       | 0.937354523    |
| 11          | CREBZF      | rs7116195  | 85051316        | 225595                                       | 0.939172724    |
| 3           | C3ORF50     | rs678690   | 170029608       | 1558411                                      | 0.939267999    |
| 19          | ZNF44       | rs2438527  | 12249152        | 215359                                       | 0.940141755    |
| 6           | PHACTR2     | rs4624889  | 144145113       | 227947                                       | 0.941354263    |
| 11          | SFRS2B      | rs620767   | 94446909        | 228760                                       | 0.943743974    |
| 9           | MAK10       | rs17353249 | 87786303        | 220925                                       | 0.944012585    |
| 6           | PHACTR2     | rs7752960  | 144171325       | 227947                                       | 0.944326296    |
| 1           | LEPR        | rs7542446  | 65863694        | 227095                                       | 0.946960847    |
| 1           | LEPR        | rs1938484  | 65853870        | 227095                                       | 0.948577486    |

| <i>Chr.</i> | <i>HUGO</i>     | <i>SNP</i> | <i>Location</i> | <i>Probe ID from gene expression dataset</i> | <i>P value</i> |
|-------------|-----------------|------------|-----------------|----------------------------------------------|----------------|
| 1           | <i>LEPR</i>     | rs4655723  | 65853372        | 227095                                       | 0.94908323     |
| 1           | <i>LEPR</i>     | rs3762274  | 65836701        | 227095                                       | 0.949600261    |
| 2           | <i>PLEKHH2</i>  | rs17031284 | 43773438        | 227148                                       | 0.949643213    |
| 6           | <i>PHACTR2</i>  | rs2024693  | 144060649       | 227947                                       | 0.950064431    |
| 21          | <i>CYYR1</i>    | rs2830278  | 26846623        | 228665                                       | 0.951297682    |
| 19          | <i>ZNF30</i>    | rs2546001  | 40112681        | 232014                                       | 0.952943549    |
| 4           | <i>HPGD</i>     | rs2612694  | 175650821       | 211548                                       | 0.953605947    |
| 6           | <i>QKI</i>      | rs2759388  | 163758784       | 212263                                       | 0.95529039     |
| 1           | <i>EFCAB7</i>   | rs7413854  | 63761072        | 226800                                       | 0.956154748    |
| 6           | <i>PHACTR2</i>  | rs7772898  | 144034956       | 227947                                       | 0.957464664    |
| 6           | <i>HMGN3</i>    | rs9294133  | 79999648        | 209377                                       | 0.957693209    |
| 21          | <i>CYYR1</i>    | rs222947   | 26833323        | 228665                                       | 0.95855747     |
| 19          | <i>HIF3A</i>    | rs8102595  | 51489670        | 1555318                                      | 0.958577155    |
| 13          | <i>TNFRSF19</i> | rs765606   | 23061339        | 227812                                       | 0.95892409     |
| 4           | <i>KIT</i>      | rs6820303  | 55236165        | 205051                                       | 0.959181446    |
| 6           | <i>PHACTR2</i>  | rs9496715  | 143992519       | 227947                                       | 0.959677865    |
| 4           | <i>KIT</i>      | rs12646437 | 55278858        | 205051                                       | 0.959812556    |
| 4           | <i>HPGD</i>     | rs1863641  | 175670295       | 211548                                       | 0.962166582    |
| 1           | <i>LEPR</i>     | rs6678033  | 65850212        | 227095                                       | 0.96527596     |
| 3           | <i>FOXP1</i>    | rs830599   | 71708952        | 238712                                       | 0.965276119    |
| 6           | <i>PHACTR2</i>  | rs7760178  | 144042549       | 227947                                       | 0.96600483     |
| 19          | <i>ZNF44</i>    | rs403386   | 12269459        | 215359                                       | 0.967101371    |
| 2           | <i>PLEKHH2</i>  | rs919694   | 43805426        | 227148                                       | 0.967167639    |
| 1           | <i>ARHGAP29</i> | rs11577575 | 94419102        | 1558280                                      | 0.967996856    |
| 2           | <i>PLEKHH2</i>  | rs7571775  | 43728793        | 227148                                       | 0.970009777    |
| 17          | <i>CROP</i>     | rs11867565 | 46182105        | 208835                                       | 0.970930128    |
| 14          | <i>DAAM1</i>    | rs941884   | 58866988        | 226666                                       | 0.973323833    |
| 6           | <i>FAM162B</i>  | rs648248   | 117187750       | 228875                                       | 0.974135377    |
| 1           | <i>EFCAB7</i>   | rs217452   | 63775444        | 226800                                       | 0.974496877    |
| 6           | <i>CCDC90A</i>  | rs6926691  | 13900579        | 220094                                       | 0.980010813    |
| 21          | <i>CYYR1</i>    | rs222941   | 26826336        | 228665                                       | 0.980032841    |
| 3           | <i>C3ORF50</i>  | rs555998   | 170032812       | 1558411                                      | 0.982046332    |
| 13          | <i>TNFRSF19</i> | rs3829942  | 23050519        | 227812                                       | 0.98240688     |
| 12          | <i>ZNF84</i>    | rs937538   | 132120315       | 228630                                       | 0.982722787    |
| 10          | <i>PPP1R3C</i>  | rs4382814  | 93377831        | 204284                                       | 0.983421482    |
| 13          | <i>TNFRSF19</i> | rs928040   | 23086233        | 227812                                       | 0.983734203    |
| 14          | <i>DAAM1</i>    | rs8017833  | 58788168        | 226666                                       | 0.986545891    |
| 19          | <i>HIF3A</i>    | rs7252284  | 51496547        | 1555318                                      | 0.987938215    |
| 19          | <i>ZNF302</i>   | rs10410491 | 39865292        | 218490                                       | 0.988689852    |
| 6           | <i>PHACTR2</i>  | rs13214196 | 144058798       | 227947                                       | 0.990113254    |
| 19          | <i>CIRBP</i>    | rs3170431  | 1223040         | 230142                                       | 0.990980334    |
| 6           | <i>PHACTR2</i>  | rs9390140  | 144168719       | 227947                                       | 0.991317619    |
| 6           | <i>PHACTR2</i>  | rs9376791  | 144170379       | 227947                                       | 0.99337886     |
| 6           | <i>CCDC90A</i>  | rs16874329 | 13895819        | 220094                                       | 0.994833766    |
| 13          | <i>TNFRSF19</i> | rs1324969  | 23124318        | 227812                                       | 0.996299663    |
| 19          | <i>CIRBP</i>    | rs4807050  | 1222529         | 230142                                       | 0.996307892    |
| 6           | <i>CCDC90A</i>  | rs1053033  | 13895063        | 220094                                       | 0.997040689    |
| 13          | <i>RCBTB1</i>   | rs7981396  | 49049927        | 218352                                       | 0.997913493    |
| 13          | <i>RBM26</i>    | rs1155848  | 78786477        | 226316                                       | 0.998148055    |
| 8           | <i>RUNX1T1</i>  | rs2979853  | 93046119        | 205528                                       | 0.998609898    |
| 6           | <i>CCDC90A</i>  | rs6922822  | 13902023        | 220094                                       | 0.999047896    |
